1 **Title page**

2 **Title:** Impact of COVID-19 and effects of booster vaccination with BNT162b2 on six-month  
3 long COVID symptoms, quality of life, work productivity and activity impairment during  
4 Omicron

5  
6 **Authors:** Manuela Di Fusco<sup>1\*</sup>, Xiaowu Sun<sup>2</sup>, Mary M. Moran<sup>3</sup>, Henriette Coetzer<sup>2</sup>, Joann M.  
7 Zamparo<sup>4</sup>, Mary B. Alvarez<sup>5</sup>, Laura Puzniak<sup>3</sup>, Ying P. Tabak<sup>2</sup>, Joseph C. Cappelleri<sup>6</sup>

8  
9 **Affiliations:**

10 <sup>1</sup> Pfizer Inc, Health Economics and Outcomes Research, New York, NY, USA

11 <sup>2</sup> CVS Health, Woonsocket, RI, USA

12 <sup>3</sup> Pfizer Inc, MDSCA Vaccines, Collegeville, PA, USA

13 <sup>4</sup> Pfizer Inc, Groton, CT, USA

14 <sup>4</sup> Pfizer Inc, Field Medical Outcomes and Analytics, New York, NY, USA

15 <sup>6</sup> Pfizer Inc, Statistical Research and Data Science Center, Groton, CT, USA

16

17 **\*Corresponding author:** Manuela Di Fusco

18 Health Economics and Outcomes Research

19 Pfizer, Inc., New York, NY, USA

20 **Manuela.difusco@pfizer.com**

## 21 Abstract

22 **Background:** Longitudinal estimates of long COVID burden during Omicron remain limited.

23 This study characterized long-term impacts of COVID-19 and booster vaccination on symptoms,  
24 Health-Related Quality of Life (HRQoL), and Work Productivity Activity Impairment (WPAI).

25  
26 **Methods:** Outpatients with  $\geq 1$  self-reported symptom and positive SARS-CoV-2 test at CVS  
27 Health United States test sites were recruited between 01/31-04/30/2022. Symptoms, EQ-5D and  
28 WPAI were collected via online surveys until 6 months following infection. Both observed and  
29 model-based estimates were analyzed. Effect sizes based on Cohen's  $d$  quantified the magnitude  
30 of outcome changes over time, within and between vaccination groups. Mixed models for  
31 repeated measures were conducted for multivariable analyses, adjusting for covariates. Logistic  
32 regression assessed odds ratio (OR) of long COVID between vaccination groups.

33  
34 **Results:** At long COVID start (Week 4), 328 participants included 87 (27%) Boosted with  
35 BNT162b2, 86 (26%) with a BNT162b2 primary series (Primed), and 155 (47%) Unvaccinated.  
36 Mean age was 42.0 years, 73.8% were female, 26.5% had  $\geq 1$  comorbidity, 36.9% prior infection,  
37 and 39.6% reported  $\geq 3$  symptoms (mean: 3.1 symptoms). At Month 6, among 260 participants,  
38 Boosted reported a mean of 1.1 symptoms versus 3.4 and 2.8 in Unvaccinated and Primed,  
39 respectively ( $p < 0.001$ ). Boosted had reduced risks of  $\geq 3$  symptoms versus Unvaccinated  
40 (observed: OR 0.22, 95% CI, 0.10-0.47,  $p < 0.001$ ; model-based: OR: 0.36, 95% CI, 0.15-0.87,  
41  $p = 0.019$ ) and Primed (observed: OR 0.29, 95% CI, 0.13-0.67,  $p = 0.003$ ; model-based: OR 0.59,  
42 95% CI, 0.21-1.65,  $p = 0.459$ ). Results were consistent using  $\geq 2$  symptoms. Regarding HRQoL,  
43 among those with long COVID, Boosted had higher EQ-5D Utility Index (UI) than

44 Unvaccinated (observed: 0.922 versus 0.731,  $p=0.014$ ; model-based: 0.910 versus 0.758,  $p$ -  
45 value=0.038) and Primed (0.922 versus 0.648,  $p=0.014$ ; model-based: 0.910 versus 0.708,  $p$ -  
46 value=0.008). Observed and model-based estimates for EQ-VAS and UI among Boosted were  
47 comparable with pre-COVID since Month 3. Subjects vaccinated generally reported better WPAI  
48 scores.

49  
50 **Conclusions:** Long COVID negatively impacted HRQoL and WPAI. The BNT162b2 booster  
51 could have a beneficial effect in reducing the risk and burden of long COVID. Boosted  
52 participants reported fewer and less durable symptoms, which contributed to improve HRQoL  
53 and maintain WPAI levels. Limitations included self-reported data and small sample size for  
54 WPAI.

55  
56 **Keywords:** COVID-19; SARS-CoV-2; COVID-19 symptoms; Long COVID; BNT162b2;  
57 Booster vaccine; HRQoL; WPAI.

58

## 59 Background

60 Long COVID is a broad array of complications of SARS-CoV-2 infection [1]. There is no single  
61 definition of long-COVID presently and prevalence estimates vary widely across studies and  
62 variants [1]. In the US, the Centers for Disease Control and Prevention (CDC) define long  
63 COVID as a multitude of symptoms and conditions persisting or emerging beyond four weeks  
64 after infection, and not explained by an alternative diagnosis [1]. Long COVID is found more  
65 often in people who had severe COVID-19 illness, but anyone who was infected can experience  
66 it [2]. While most individuals with long COVID are mildly affected and recover shortly after  
67 infection, some can suffer from persistent symptoms that can affect the Health-Related Quality  
68 of Life (HRQoL) and impact daily social and professional activities [3].  
69 Multiple studies assessed whether vaccinated individuals are associated with a lower risk of long  
70 COVID, several of them show that long COVID is less likely to occur following breakthrough  
71 infection in vaccinated compared with unvaccinated individuals [4-7]. However, numerous  
72 studies were conducted in selected populations that may affect generalizability [4, 5, 7, 8],  
73 assessed a mix of COVID-19 vaccines, and the certainty of evidence was considered low when  
74 pooling studies [6, 8]. Moreover, there is limited data on the long-term effects of COVID-19 and  
75 the potential benefits of COVID-19 vaccination on symptoms, well-being, and ability to return to  
76 work.  
77 We aimed to address these gaps using a prospective longitudinal study design assessing long  
78 COVID prevalence and levels of HRQoL and WPAI through 6 months following infection, and  
79 among groups defined by COVID-19 vaccination status. Our study focused on BNT162b2, the  
80 most used COVID-19 vaccine in the US [1].

## 81 Methods

### 82 Study design and cohorts

83 The study design was previously described [9] (clinicaltrials.gov NCT05160636). Briefly, this  
84 was a nationwide prospective survey-based patient-reported outcomes (PRO) study targeting  
85 adults  $\geq 18$  years old with a positive reverse transcription–polymerase chain reaction (RT-PCR)  
86 test result and self-reporting at least one symptom suggestive of acute SARS-CoV-2 infection at  
87 time of testing [9]. The source population consisted of adults testing for SARS-CoV-2 at one of  
88 ~5,000 CVS Health test sites across the US. Recruitment of consenting participants was carried  
89 out between 01/31/2022 and 04/30/2022, with follow-up occurring through October 30, 2022.  
90 Interim results for the acute phase (up to 4 weeks after infection) were previously presented [9].  
91 This analysis presents the final results, focusing on long-term outcomes until month 6.  
92 At enrollment, we categorized the participants based on their COVID-19 vaccination history.  
93 Immunocompetent participants were considered fully vaccinated with BNT162b2 if they self-  
94 reported receipt of 2 doses of BNT162b2  $\geq 14$  days prior to SARS-CoV-2 testing. They were  
95 considered partially vaccinated if reporting receipt of only one of the two primary series dose,  
96 and boosted if reporting receipt of at least one dose after the primary series. Participants self-  
97 reporting an immunocompromising condition and receipt of 3 doses were considered fully  
98 vaccinated; if reporting 4 doses, they were considered boosted. Participants were considered  
99 unvaccinated if they did not report any COVID-19 vaccine dose prior to testing. The study  
100 population was classified in three mutually exclusive cohorts: (1) the “Primed” cohort of subjects  
101 who received primary series, (2) the “Boosted” cohort of subjects with at least one dose after  
102 primary series, and (3) the “Unvaccinated” cohort of subject with no evidence of vaccination.  
103 Heterologous schedules were excluded (Supplemental Figure 1). To confirm vaccination status,

104 participants' subsequent responses to vaccination date questions were compared with their index  
105 responses (at time of registering for testing); if responses did not match, the information was  
106 queried and adjudicated, and the latest information was used.

## 107 Baseline characteristics and symptoms

108 Baseline characteristics were obtained via the CVS Health pre-test screening questionnaire.  
109 These included self-reported demographics, comorbidities, COVID-19 vaccination history,  
110 social determinants of health including the Social Vulnerability Index (SVI), work and/or  
111 residency in a high-risk or healthcare setting, and symptoms [10]. The list of COVID-19  
112 symptoms came from the CDC's definition [11].

## 113 Long COVID Symptoms

114 The presence of long COVID symptoms was assessed via a questionnaire including 20  
115 symptoms based on the 2021 CDC list [1]. The questionnaire was administered at week 4, month  
116 3 and 6 after enrollment. Week 4 was considered the start of long COVID, in alignment with  
117 CDC [1]. The list of symptoms included general symptoms (tiredness or fatigue, symptoms that  
118 get worse after physical or mental activities, fever, general pain/discomfort), respiratory and  
119 cardiac symptoms (difficulty breathing or shortness of breath, cough, chest or stomach pain, fast-  
120 beating or pounding heart (also known as heart palpitations)), neurological symptoms (change in  
121 smell or taste, headache, dizziness on standing (lightheadedness), difficulty thinking or  
122 concentrating ( "brain fog"), pins-and-needles feeling, sleep problems, mood changes, memory  
123 loss), and other symptoms (diarrhea, joint or muscle pain, rash, changes in period cycles).  
124 (Supplemental Figure 2).  
125 Studies describing the prevalence of long COVID in the general population testing positive for  
126 COVID-19 have used different thresholds for duration and intensity of symptoms [12-14].

127 Interim data from the CDC-funded INSPIRE Registry reported long COVID among subjects  
128 who were symptomatic at time of testing using a cutoff of  $\geq 3$  symptoms at 3 months post  
129 infection, with follow-up surveys scheduled every three months until 18 months post-enrollment  
130 [15, 16]. Considering the similarities in the total number of symptoms assessed ( $\sim 20$ ), eligibility  
131 criteria and study design, this study used a similar cut-off of  $\geq 3$  symptoms, assessed 3- and 6-  
132 months following infection

### 133 Health-Related Quality of Life

134 We used EQ-5D-5L to assess HRQoL [17]. Completion of the questionnaire was requested at  
135 enrollment, at month 1, 3 and 6 [9]. Five dimensions of EQ-5D-5L at each time point were  
136 converted into the Utility Index (UI) using the US-based weights by Pickard et al [18]. UI and  
137 visual analogue scale (VAS) scores were compared among cohorts and across assessment times  
138 [17].

### 139 Work Productivity and Activity Impairment

140 To measure impairments in both paid work and unpaid work, we used the Work Productivity and  
141 Activity Impairment General Health V2.0 (WPAI:GH) measure [19, 20]. Participants were asked  
142 to complete the survey seven days after their RT-PCR test, at month 1, 3 and 6. Only employed  
143 subjects were included for work productivity analyses. The WPAI results were compared across  
144 cohorts and assessment times.

### 145 Statistical methods

146 The statistical methods were previously described [9]. Descriptive statistics were used to analyze  
147 participant characteristics at baseline. Continuous variables were described using means and  
148 standard deviations. Categorical variables were summarized with frequency and percentages. For  
149 continuous variables, t-tests were used to test difference in means. Between-group differences in

150 categorical variables were tested by using chi-square statistics. When expected cell frequency  
151 count was less than 5, Fisher's exact tests were used for 2-by-2 tables and Freeman-Halton tests  
152 for r-by-c tables [21, 22]. Analysis of variance (ANOVA) was used to test differences in means.  
153 Tukey's studentized range test was adopted for post ANOVA pairwise comparisons of means  
154 between study cohorts [21, 23]. P values were all two-sided. Logistic regression model [20] was  
155 used to assess the odds ratio of long COVID symptoms between study cohorts.  
156 Mixed models for repeated measures (MMRM) were used to estimate the magnitude of COVID-  
157 19 impact on HRQoL and WPAI over time [24]. Assessment time was fitted as a categorical  
158 covariate and a repeated effect (repeated by subject). Least squares mean (LS mean) and  
159 standard errors of PRO scores for each time point of assessment were calculated. Per guidelines,  
160 no adjustment was made for missing data when scoring the EQ-5D-5L UI and WPAI [17, 20]. .  
161 All available data were included in the analysis. Tukey's adjustment was conducted for the  
162 comparisons of least-square means between study cohorts at each time point.  
163 Cohen's d, or a variation of it, was calculated to assess the difference in pre-COVID scores  
164 among Boosted, Primed and Unvaccinated, the magnitude of score change from baseline at  
165 Week 4, Month 3 and 6 within each cohort, as well as the differences between cohorts [25, 26].  
166 Specifically, within-cohort effect size (ES) was calculated as mean change from baseline to  
167 follow-up, divided by the standard deviation of change scores from baseline to follow-up [9].  
168 Between-cohort ES was calculated as the difference in mean score between cohorts, divided by  
169 the pooled standard deviation of scores, or the difference in mean changes from baseline between  
170 cohorts, divided by the pooled standard deviation of change scores [9]. Values of 0.2, 0.5, and  
171 0.8 standard deviation (SD) units were taken represent "small," "medium," and "large" effect  
172 sizes, respectively [9, 25]. All analyses were conducted with SAS Version 9.4 (SAS Institute,



173 Cary, NC). The study followed the Strengthening the Reporting of Observational Studies in  
174 Epidemiology (STROBE) reporting guideline [27].

## 175 Results

### 176 Study population

177 Table 1 describes the characteristics of the 328 participants at baseline (i.e., four weeks after  
178 infection). There were 87 (27%) Boosted, 86 (26%) Primed, and 155 (47%) Unvaccinated. There  
179 were no subjects partially vaccinated. At Month 6, 21% (68/328) of participants dropped off.  
180 Mean time from last dose of BNT162b2 to testing positive was 2.3 (standard deviation, SD: 1.9)  
181 months and 6.9 (SD: 3.0) months for Boosted and Primed, respectively. The population was 42.0  
182 years old on average, 73.8% were female, 26.5% reported  $\geq 1$  comorbidity and 36.9% were  
183 previously infected.

184 The three groups generally looked similar in terms of age, gender, race, prior infection, number  
185 of comorbidities and risk levels in workplace and household settings. Boosted participants were  
186 associated with less social vulnerability, with a mean SVI of 0.36 compared with 0.44 in Primed  
187 and 0.47 in Unvaccinated ( $p < 0.001$ ). Primed and Unvaccinated looked similar in terms of SVI,  
188 comorbidities, and acute COVID-19 symptoms. Boosted reported fewer acute COVID-19  
189 symptoms, with a mean of 4.7 acute symptoms compared with 5.7 in Primed and 5.6 in  
190 Unvaccinated ( $p = 0.009$ ). Systemic symptoms (fever, chills and muscle or body aches) and  
191 congestion/ runny nose among Boosted were significantly lower than Primed and Unvaccinated.

192

### 193 Long COVID-19 risk and symptoms

194 *Time trends through Month 6*

195 Prevalence rates of long COVID-19 by assessment time and vaccination status are presented in  
196 Table 2 and Supplemental Figure 3. Overall, 39.6%, 37.3% and 35.0% experienced  $\geq 3$   
197 symptoms at Week 4, Month 3 and 6, respectively. The most prevalent symptom was  
198 consistently reported to be “Fatigue or Tiredness”, experienced by 41.2%, 37.3% and 38.8% at  
199 Week 4, Month 3 and 6, respectively.

200 Figure 1 illustrates time trends of prevalence rates of long COVID symptoms by vaccination  
201 status. Across all time points, the Boosted line appeared below and separated from the ones of  
202 Unvaccinated and Primed when using the base case definition of long COVID with a cut-off of  
203  $\geq 3$  symptoms (Figure 1a), as well as when using a cutoff of  $\geq 2$  symptoms (Figure 1b). Figures  
204 1c-1f show the prevalence rates of long COVID by body system: across all time points and  
205 symptom type, the Boosted line appeared below and separated from the ones of Unvaccinated  
206 and Primed. Among Boosted, declines were visible at Month 6 in Respiratory and Cardiac  
207 Symptoms, General Symptoms, and Neurologic Symptoms.

208

209 From Week 4 to Month 6, noticeable improvements were observed among Boosted in several  
210 symptoms, such as Tiredness or Fatigue (32.2% to 22.4%), Cough (24.1% to 0.0%), Difficulty  
211 thinking or concentrating (19.5% to 7.5%), Difficulty breathing or shortness of breath (14.9% to  
212 4.5%), Sleep problems (16.1% to 4.5%), and Symptoms that get worse after physical or mental  
213 activities (9.2% to 1.5%). Supplemental Figures 4 and 5 illustrate, respectively, time trends of  
214 the mean numbers of symptoms by vaccination status, and the proportions of participants  
215 reporting no symptoms over time: the Boosted lines were consistently separated from the ones of  
216 Unvaccinated and Primed.

217

218 *Week 4*

219 At long COVID start, participants reported a mean of 3.1 symptoms. Boosted reported fewer  
220 symptoms: on average, 2.0 symptoms, significantly lower than 3.1 in Primed and 3.7 in  
221 Unvaccinated ( $p=0.002$ ). The prevalence of long COVID ( $\geq 3$  symptoms) was 29.9%, 41.9%, and  
222 43.9% among Boosted, Primed and Unvaccinated, respectively, being directionally lower in  
223 Boosted ( $p=0.091$ ). Relative to Unvaccinated, all symptoms' prevalence rates were numerically  
224 lower in Boosted, and numerically lower or similar relative to Primed. Several symptoms were  
225 significantly lower: symptoms worsening after physical or mental activities (8.5%), General  
226 pain/discomfort (5.8%), Change in smell or taste (5.8%), Headache (11.5%), Memory loss  
227 (4.6%), and Diarrhea (3.5%) (Table 2).

228

229 *Month 3*

230 At Month 3, the prevalence of long-COVID was 23.3%, 41.6%, and 42.3% among Boosted,  
231 Primed and Unvaccinated, respectively, being lowest in Boosted ( $p=0.016$ ). Study participants  
232 reported a mean of 2.7 symptoms. Subjects Boosted reported on average 1.4 symptoms,  
233 significantly lower than 2.8 in Primed and 3.3 in Unvaccinated ( $p=0.001$ ). (Table 2) All  
234 symptoms' prevalence rates were numerically lower in Boosted compared to Unvaccinated and  
235 Primed. Significantly lower rates were reported for Boosted for General pain/discomfort (4.1%),  
236 Headache (8.2%), Dizziness on standing (lightheadedness) (4.1%), Difficulty thinking or  
237 concentrating (15.1%), Sleep problems (11.0%), Mood changes (2.7%), and Memory loss (0.0%)  
238 (Table 2).

239

240 *Month 6*

241 At the end of the study period, the prevalence of long-COVID was 14.9%, 37.5%, and 44.6%  
242 among Boosted, Primary and Unvaccinated, respectively, being lowest among Boosted  
243 ( $p < 0.001$ ). Odds Ratios (OR) calculated based on observed data showed that pre-COVID booster  
244 vaccination was associated with a reduced risk of long COVID (expressed as  $\geq 3$  symptoms)  
245 versus Unvaccinated (OR=0.22, 95% CI: 0.10-0.47,  $p < 0.001$ ) and Primed (OR=0.29, 95% CI:  
246 0.12-0.67,  $p = 0.003$ ). Those Primed were associated with a non-significant reduction in the odds  
247 of long COVID against Unvaccinated (OR=0.74, 95% CI: 0.41-1.35,  $p = 0.332$ ). The logistic  
248 regression model provided a similar result of reduced odds of long COVID for Boosted versus  
249 Unvaccinated (OR=0.36, 95% CI: 0.15-0.87,  $p = 0.019$ ), and a non-significant reduction in the  
250 odds of long COVID against Primed (OR=0.59, 95% CI: 0.21-1.65,  $p = 0.459$ ). Similarly, a non-  
251 significant reduction in the odds of long COVID was estimated for Primed versus Unvaccinated  
252 (OR=0.60, 95% CI: 0.27-1.34,  $p = 0.296$ ). Results were consistent when using an alternative  
253 definition of long COVID as  $\geq 2$  symptoms (Table 3).

254 Study participants reported a mean of 2.7 symptoms at 6 months. The average number of  
255 symptoms was 1.1 in Boosted, significantly lower than 2.8 in Primed and 3.4 in Unvaccinated  
256 ( $p < 0.001$ ) (Table 2). All symptoms' prevalence rates were numerically lower or similar in  
257 Boosted compared with Unvaccinated and Primed. Significantly lower rates were reported in  
258 Boosted for Tiredness or Fatigue (22.4%), Symptoms that get worse after physical or mental  
259 activities, (1.5%), General pain/discomfort (3.0%), Difficulty breathing or shortness of breath  
260 (4.5%), Cough (0.0%), Fast-beating or pounding heart (4.5%), Headache (7.5%), Difficulty  
261 thinking or concentrating (7.5%), Sleep problems (4.5%), Mood changes (4.5%), Memory loss  
262 (3.0%) (Table 2).

263

264 **EQ-5D-5L**

265 The study participants with long COVID ( $\geq 3$  symptoms at Week 4, N=130) reported a pre-  
266 COVID mean EQ-VAS and Utility Index (UI) scores of, respectively, 84.9 and 0.879 (Table 4).

267 Such values were not significantly different by vaccination status.

268 At Week 4, the observed (Table 4) and model-based (Table 5) EQ-VAS scores were lower than  
269 pre-COVID, regardless of vaccination status (not significantly for Primed according to the  
270 model-based estimates). The observed EQ-VAS scores for the entire long COVID population  
271 were numerically similar between Week 4 (74.2) and Month 6 (74.5), and, by the end of the  
272 study period, they did not return to pre-COVID levels. The observed EQ-VAS scores in  
273 Unvaccinated and Primed were still significantly lower than pre-COVID at Month 3 and 6; only  
274 Boosted reported EQ-VAS levels not different than pre-COVID at Month 3 ( $p=0.266$ ) and  
275 Month 6 ( $p=0.121$ ). The model-based EQ-VAS scores were numerically lower at Month 3 and 6  
276 regardless of vaccination status, while not significantly different from pre-COVID, except for  
277 Primed at Month 6 (Table 5).

278 Both observed (Table 4) and model-based (Table 5) UI scores were lower than pre-COVID for  
279 Unvaccinated and Primed for Month 3 and 6 while not different among Boosted. Consistently,  
280 the model-based UI scores of Boosted were not different from pre-COVID at Month 3, 6 and  
281 since Week 4, too (Table 5).

282 The observed UIs values for the entire long-COVID population were numerically similar  
283 between Week 4 (0.74), Month 3 (0.74) and 6 (0.73) and did not return to pre-COVID levels.  
284 Such effect was driven by the detrimental effect of COVID-19 reported by Unvaccinated and  
285 Primed. At Week 4, the mean UI change from pre-COVID in Boosted was significantly lower

286 than in Unvaccinated based on observed data and numerically lower according to model-based  
287 estimates.

288 The mean changes in UIs from pre-COVID in Boosted were significantly lower versus  
289 Unvaccinated at Month 3 and 6 based on both observed and model estimates, with medium-to-  
290 high effect sizes. The mean changes from pre-COVID in UIs reported by Boosted were  
291 significantly lower than Primed at Month 3 and 6 based on both observed and model estimates,  
292 with medium-to-high effect sizes.

293 The impact of COVID-19 on the HRQoL was detrimental for participants with long COVID, but  
294 significantly less so for Boosted, the group with the highest UI and EQ-VAS scores during the 6-  
295 month study period.

296

## 297 **WPAI**

298 The WPAI analyses had a smaller eligible population and were impacted by small sample size.

299 A total of 85 long COVID study participants (66%) reported being currently employed at Week  
300 4 and were eligible to complete the work productivity questions. Of those, 42 (49%)

301 Unvaccinated, 26 (31%) Primed and 17 (20%) Boosted.

302 Participants reported a pre-COVID mean Work Productivity (WP) loss of 15.1% (Table 4). Such  
303 values were not significantly different by vaccination status. At Week 4, the observed WP loss  
304 increased substantially to 31.7%. The observed WP loss scores for the entire long-COVID  
305 population were numerically similar between Week 4 (31.7%), Month 3 (26.1%) and Month 6  
306 (33.9%), and did not return to pre-COVID levels. Such effect was driven by the detrimental  
307 effect of COVID-19 reported by Unvaccinated. At Week 4, both observed and model-based WP  
308 scores were significantly lower than pre-COVID for the Unvaccinated. At Month 3 and 6, the

309 observed and model-based mean change in WP levels were not significantly different than pre-  
310 COVID for Boosted and Primed (non-significant for model-based estimated for Boosted at  
311 Month 6), suggesting a return to pre-COVID levels for these vaccinated groups only.  
312 The long COVID study participants (N=130) reported a pre-COVID mean Activity Impairment  
313 (AI) of 21.3% (Table 4). Such values were not significantly different by vaccination status. At  
314 Week 4, the observed AI increased substantially to 38.1%. The observed AI scores for the entire  
315 long-COVID population were numerically similar between Week 4 (38.1%), Month 3 (31.7%)  
316 and Month 6 (37.5%), and did not return to pre-COVID levels. Such effect was driven by the  
317 detrimental effect of COVID-19 reported by Unvaccinated, who reported the highest AI across  
318 all time points. At Week 4, the mean change from pre-COVID was significantly lower than  
319 Unvaccinated for Boosted and Primed based on both the observed and model-based estimates. At  
320 Month 3 and Month 6, all groups were still highly impacted; subjects Boosted reported the  
321 lowest AI levels.  
322

## 323 Discussion

324 In this national observational study conducted among US symptomatic outpatients with a  
325 documented SARS-CoV-2 infection, long COVID had a detrimental effect on well-being, work  
326 productivity and activity levels. Long COVID symptoms were found persistent over 6 months in  
327 over a third of the study cohort, resulting in prolonged limitation of activities and work  
328 productivity. Compared with Primed and Unvaccinated, subjects Boosted with BNT162b2 prior  
329 to a breakthrough infection were associated with significantly lower likelihood of long COVID  
330 onset, fewer symptoms, and faster improvement over time. Positive trends in the outcomes  
331 assessed were observed for Primed versus Unvaccinated, although generally not statistically  
332 significant, most likely due to the relatively long mean time since last dose for Primed. The  
333 prevalence of enduring symptoms after a mild COVID infection in this study was generally  
334 consistent with published literature[1-5, 8]. The protective association was consistent based on  
335 observed and model-based analyses and using alternative definitions of long COVID. These  
336 findings support growing research and consensus that prior COVID-19 vaccination may have a  
337 protective effect against long COVID [4-8].

338 This study has several strengths compared with prior research. From a novelty perspective, this  
339 study is one of a limited number assessing diverse PROs associated with long COVID in a  
340 nationwide real-world source population. As such, it contributes a holistic picture of the long-  
341 term humanistic outcomes of COVID-19, assessed directly from a patient's perspective. From an  
342 internal validity perspective, the study enrolled patients within days from testing positive and  
343 prospectively collected survey-based data, potentially reducing recall bias risks. Moreover, the  
344 study leveraged widely used validated PRO instruments (EQ-5D-5L, WPAI) and a questionnaire  
345 capturing a comprehensive symptoms list aligned to CDC research on long COVID [1]. With



346 asymptomatic infections excluded by design, our estimates can be interpreted exclusively as  
347 related to symptomatic disease, potentially reducing the risk of overestimating the prevalence of  
348 long COVID among symptomatic. Further, both observed and model-based analyses yielded  
349 consistent results, and our findings were robust using alternative case definitions. Finally, with  
350 all study activities carried out virtually, this study piloted an innovative approach to agile and  
351 digitally enabled research during a pandemic.

352 The study is subject to several limitations. As previously described [9], all data collected was  
353 self-reported, subject to missingness, errors, recall bias, social desirability bias and selection bias  
354 associated with survey drop-off. Out of 328 participants, 21% dropped off at Month 6, possibly  
355 due to response fatigue and/or survey burden. Such drop-off rate should be interpreted in the  
356 context of participants being asked not to skip surveys. Such a strict requirement allowed for a  
357 clean assessment of changes in outcomes prevalence over time, but at the cost of attrition. Other  
358 limitations included the female over-representation, the relatively healthy status of the source  
359 population, and the fact that the study focused on adults only [9]. Further, the long COVID  
360 definitions used were based on presence of symptoms, with no assessment of severity of  
361 symptoms. Despite adjusting for several covariates, risk of residual confounding remains.  
362 Finally, these findings may not be generalizable to prior or future variants, other countries, time  
363 periods and populations that were excluded.

364 Booster vaccination with BNT162b2 has been shown to be safe and effective at reducing the risk  
365 of infection and potentially protective against long COVID [6, 8]; this study shows its potential  
366 beneficial effect in preventing long COVID and attenuating its burden. These outcomes can  
367 inform estimation of quality-adjusted life years and indirect costs. While this study contributes to

368 addressing knowledge gaps related to long COVID, the characterization of long COVID  
369 continues to evolve [28-30]. Future studies could corroborate these findings with different data  
370 collection methods and designs, considering a non-COVID comparator, longer follow-up times,  
371 use of COVID-19 specific validated instruments, as well as if these protective effects may  
372 minimize impact on other individuals and households.

## 373 Conclusions

374 Long COVID had a detrimental effect on well-being, work productivity and activity levels.  
375 Booster vaccination with BNT162b2 generally offered the highest level of protection against  
376 long COVID. The booster was associated with less symptomatic infection and faster  
377 improvement, with boosted subjects experiencing the lowest number of symptoms over time.  
378 This, in turn, contributed to improved HRQoL and maintained productivity and activities. These  
379 findings support current recommendations for broad use of BNT162b2.

380

## 381 Abbreviations

382 ANOVA: Analysis of variance; CDC: Centers for Disease Control and Prevention; CI:  
383 confidence interval; ES: effect size; SD: standard deviation; SVI: social vulnerability index; UI:  
384 utility index; VAS: visual analogue scale; WPAI: work productivity and impairment.

385

## 386 **Declarations**

### 387 **Ethics approval and consent to participate**

388 This study was approved by the Sterling IRB, Protocol #C4591034. Participation in the study  
389 was voluntary and anonymous. Consent was obtained electronically via the CVS Health E-  
390 Consent platform. Participants were informed of their right to refuse or withdraw from the study  
391 at any time. Participants were compensated for their time.

### 392 **Consent for publication**

393 All authors have given their approval for this manuscript version to be published.

### 394 **Availability of data and materials**

395 Aggregated data that support the findings of this study are available upon reasonable request  
396 from the corresponding author MDF, subject to review. These data are not publicly available due  
397 to them containing information that could compromise research participant privacy/consent.

### 398 **Competing interests**

399 MDF, MMM, JMZ, LP, MBA and JCC are employees of Pfizer and may hold stock or stock  
400 options of Pfizer. XS and HC are employees of CVS Health and may hold stock of CVS health.  
401 YPT was employee of CVS Health when current study was conducted.

### 402 **Funding**

403 This study was sponsored by Pfizer Inc.

### 404 **Author contributions**

405 All named authors meet the International Committee of Medical Journal Editors (ICMJE) criteria  
406 for authorship for this article. XS: Conceptualization, Methodology, Data curation, Formal  
407 analysis, Writing - original draft. MDF and YP: Investigation, Project administration,

408 Conceptualization, Writing - Review & editing. MMM, HC, LP, MBA, and JMZ:

409 Conceptualization, Writing - Review & editing. JCC: Conceptualization, Methodology, Formal  
410 analysis, Writing - Review & editing.

## 411 Acknowledgements

412 The authors acknowledge Nancy Gifford (Pfizer employee), Joseph Ferenchick, Shiyu Lin and  
413 Shawn Edmonds (CVS Health employees) for specific contributions to this research project.

414 Editorial support was provided by Laura Anatale-Tardiff and Leena Samuel at CVS Health and  
415 was funded by Pfizer.

## 416 References

- 417 1. Centers for Disease Control and Prevention. Long COVID or Post-COVID Conditions.  
418 <https://www.cdc.gov/coronavirus/2019-ncov/long-term-effects/index.html> Accessed August 15,  
419 2022.
- 420 2. Ledford H (2022) How common is long COVID? Why studies give different answers. *Nature*.  
421 606(7916):852-3.
- 422 3. Robertson M, Qasmieh S, Kulkarni S, Teasdale CA, Jones HE, McNairy M, Borrell LN, Nash D  
423 (2022) The epidemiology of long COVID in US adults two years after the start of the US SARS-  
424 CoV-2 pandemic. medRxiv.
- 425 4. Azzolini E, Levi R, Sarti R, Pozzi C, Mollura M, Mantovani A, Rescigno M (2022) Association  
426 between BNT162b2 vaccination and long COVID after infections not requiring hospitalization in  
427 health care workers. *Jama*. 328(7):676-8.
- 428 5. Al-Aly Z, Bowe B, Xie Y (2022) Long COVID after breakthrough SARS-CoV-2 infection.  
429 *Nature Medicine*. 1-7.
- 430 6. Notarte KI, Catahay JA, Velasco JV, Pastrana A, Ver AT, Pangilinan FC, Peligro PJ, Casimiro  
431 M, Guerrero JJ, Gellaco MML (2022) Impact of COVID-19 vaccination on the risk of developing  
432 long-COVID and on existing long-COVID symptoms: A systematic review. *EClinicalMedicine*.  
433 53:101624.
- 434 7. Ioannou GN, Baraff A, Fox A, Shahoumian T, Hickok A, O'Hare AM, Bohnert AS, Boyko EJ,  
435 Maciejewski ML, Bowling CB (2022) Rates and Factors Associated With Documentation of  
436 Diagnostic Codes for Long COVID in the National Veterans Affairs Health Care System. *JAMA*  
437 *Netw Open*. 5(7):e2224359. 10.1001/jamanetworkopen.2022.24359.
- 438 8. Byambasuren O, Stehlik P, Clark J (2023) Effect of covid-19 vaccination on long covid:  
439 systematic review. *BMJ Med*. 2:e000385.
- 440 9. Di Fusco M, Sun X, Moran MM, Coetzer H, Zamparo JM, Puzniak L, Alvarez MB, Tabak YP,  
441 Cappelleri JC (2022) Impact of COVID-19 and effects of BNT162b2 on patient-reported  
442 outcomes: quality of life, symptoms, and work productivity among US adult outpatients. *Journal*  
443 *of Patient-Reported Outcomes*. 6.
- 444 10. CDC/ATSDR Social Vulnerability Index.  
445 <https://www.atsdr.cdc.gov/placeandhealth/svi/index.html> Accessed May 24, 2021.

- 446 11. Centers for Disease Control and Prevention. Updates - Symptoms of COVID-19.  
447 <https://www.cdc.gov/coronavirus/2019-ncov/symptoms-testing/symptoms.html> Accessed August  
448 1 2021.
- 449 12. Landry M, Bornstein S, Nagaraj N, Sardon Jr GA, Castel A, Vyas A, McDonnell K, Agneshwar  
450 M, Wilkinson A, Goldman L (2023) Postacute Sequelae of SARS-CoV-2 in University Setting.  
451 *Emerging Infectious Diseases*. 29(3).
- 452 13. Perlis RH, Santillana M, Ognyanova K, Safarpour A, Trujillo KL, Simonson MD, Green J,  
453 Quintana A, Druckman J, Baum MA (2022) Prevalence and correlates of long COVID symptoms  
454 among US adults. *JAMA network open*. 5(10):e2238804-e.
- 455 14. O'Mahoney LL, Routen A, Gillies C, Ekezie W, Welford A, Zhang A, Karamchandani U, Simms-  
456 Williams N, Cassambai S, Ardavani A (2023) The prevalence and long-term health effects of  
457 Long Covid among hospitalised and non-hospitalised populations: A systematic review and meta-  
458 analysis. *EClinicalMedicine*. 55:101762.
- 459 15. Gottlieb M, Wang R, Yu H, Spatz ES, Montoy JC, Rodriguez R, Chang AM, Elmore JG,  
460 Hannikainen PA, Hill M (2023) Severe Fatigue and Persistent Symptoms at Three Months  
461 Following SARS-CoV-2 Infections During the Pre-Delta, Delta, and Omicron Time Periods: A  
462 Multicenter Prospective Cohort Study. *Clinical Infectious Diseases*.ciad045.
- 463 16. Spatz ES, Gottlieb M, Wisk LE, Anderson J, Chang AM, Gentile NL, Hill MJ, Huebinger RM,  
464 Idris AH, Kinsman J (2022) Three-Month Symptom Profiles Among Symptomatic Adults With  
465 Positive and Negative Severe Acute Respiratory Syndrome Coronavirus 2 (SARS-CoV-2) Tests:  
466 A Prospective Cohort Study From the INSPIRE Group. *Clinical Infectious Diseases*.ciac966.
- 467 17. EuroQol Research Foundation. (2019) EQ-5D-5L User Guide, Version 3.0.  
468 <https://euroqol.org/publications/user-guides> Accessed August 5, 2021.
- 469 18. Pickard AS, Law EH, Jiang R, Pullenayegum E, Shaw JW, Xie F, Oppe M, Boye KS, Chapman  
470 RH, Gong CL, Balch A, Busschbach JJV (2019) United States Valuation of EQ-5D-5L Health  
471 States Using an International Protocol. *Value Health*. 22(8):931-41. 10.1016/j.jval.2019.02.009.
- 472 19. Reilly MC, Zbrozek AS, Dukes EM (1993) The validity and reproducibility of a work  
473 productivity and activity impairment instrument. *Pharmacoeconomics*. 4(5):353-65.
- 474 20. Reilly Associates. (2002) WPAI Scoring. [http://www.reillyassociates.net/WPAI\\_Scoring.html](http://www.reillyassociates.net/WPAI_Scoring.html)  
475 Accessed August 5, 2021.
- 476 21. Rosner B (2015) *Fundamentals of biostatistics*. Eighth ed. Cengage learning, Boston, MA
- 477 22. Freeman G, Halton JH (1951) Note on an exact treatment of contingency, goodness of fit and  
478 other problems of significance. *Biometrika*. 38(1/2):141-9.
- 479 23. Tukey J (1953) Multiple comparisons. *Journal of the American Statistical Association*.  
480 48(263):624-5.
- 481 24. Fitzmaurice GM, Laird NM, Ware JH (2012) *Applied longitudinal analysis*. John Wiley & Sons,  
482 Hoboken, NJ
- 483 25. Cohen J (1988) *Statistical power analysis for the behavioral sciences*. 2nd ed. Lawrence Erlbaum  
484 Assoc, Hillsdale, NJ.
- 485 26. McLeod LD, Cappelleri JC, Hays RD (2016) Best (but oft-forgotten) practices: expressing and  
486 interpreting associations and effect sizes in clinical outcome assessments. *The American journal*  
487 *of clinical nutrition*. 103(3):685-93. Erratum: 2017; 105:241. 2016  
488 <https://doi.org/10.3945/ajcn.115.120378>. Erratum: 2017 <https://doi.org/10.3945/ajcn.116.148593>.
- 489 27. STROBE Statement—Checklist of items that should be included in reports of cohort studies.  
490 <https://www.strobe-statement.org/download/strobe-checklist-cohort-studies-pdf> Accessed August  
491 5, 2022.
- 492 28. Global Burden of Disease Long COVID Collaborators (2022) Estimated Global Proportions of  
493 Individuals With Persistent Fatigue, Cognitive, and Respiratory Symptom Clusters Following  
494 Symptomatic COVID-19 in 2020 and 2021. *JAMA*. 328(16):1604-15. 10.1001/jama.2022.18931.

- 495 29. Lubell J. (2022) Long COVID: Over 200 symptoms, and a search for guidance. <https://www.ama->  
496 [assn.org/delivering-care/public-health/long-covid-over-200-symptoms-and-search-guidance](https://www.ama-assn.org/delivering-care/public-health/long-covid-over-200-symptoms-and-search-guidance)  
497 Accessed December 27, 2022.
- 498 30. World Health Organization. A clinical case definition of post COVID-19 condition by a Delphi  
499 consensus, 6 October 2021. <https://www.who.int/publications/i/item/WHO-2019-nCoV->  
500 [Post\\_COVID-19\\_condition-Clinical\\_case\\_definition-2021.1](https://www.who.int/publications/i/item/WHO-2019-nCoV-Post_COVID-19_condition-Clinical_case_definition-2021.1) Accessed December 27, 2022.  
501
- 502

|     |                                                                                                |    |
|-----|------------------------------------------------------------------------------------------------|----|
| 503 | List of Tables                                                                                 |    |
| 504 | Table 1 Baseline Demographic and Clinical Characteristics of Study Participants at Week 4 .... | 24 |
| 505 | Table 2. Summary of Post-COVID-19 Symptoms at 1-, 3- and 6-month follow-up.....                | 27 |
| 506 | Table 3. Long COVID Symptoms at Month 6 by Vaccination Status: Observed and Model-based        |    |
| 507 | Estimates.....                                                                                 | 30 |
| 508 | Table 4. Summary of Observed EQ-5D-5L and WPAI scores by assessment time and vaccination       |    |
| 509 | status in long COVID subjects.....                                                             | 31 |
| 510 | Table 5. Least-Square Mean Estimates and 95% CI of EQ-5D-5L and WPAI-GH scores in long         |    |
| 511 | COVID subjects.....                                                                            | 34 |
| 512 |                                                                                                |    |
| 513 | List of Figures                                                                                |    |
| 514 | Figure 1. Trajectory of prevalence of long COVID over time, by vaccination status and type.... | 37 |
| 515 |                                                                                                |    |
| 516 | List of Supplemental Figures                                                                   |    |
| 517 | Supplemental Figure 1 Study Flow Chart .....                                                   | 38 |
| 518 | Supplemental Figure 2 Questionnaire on long COVID symptoms.....                                | 39 |
| 519 | Supplemental Figure 3 Prevalence of long COVID symptoms by vaccination status .....            | 40 |
| 520 | Supplemental Figure 4 Number of symptoms over time by vaccination status .....                 | 42 |
| 521 | Supplemental Figure 5 Absence of long COVID symptoms by vaccination status .....               | 43 |
| 522 |                                                                                                |    |
| 523 |                                                                                                |    |

524 Table 1 Baseline Demographic and Clinical Characteristics of Study Participants at Week 4

|                                             | All         | Boosted     | Primed      | Unvaccinated | P value <sup>a</sup> |
|---------------------------------------------|-------------|-------------|-------------|--------------|----------------------|
| Total, n (%)                                | 328         | 87 (26.5)   | 86 (26.2)   | 155 (47.3)   |                      |
| Age, years                                  |             |             |             |              |                      |
| Mean, SD                                    | 42.0 (14.5) | 44.3 (17.0) | 41.7 (14.2) | 40.9 (13.0)  | 0.200                |
| 18-29                                       | 73 (22.3%)  | 18 (20.7%)  | 23 (26.7%)  | 32 (20.6%)   | 0.110                |
| 30-49                                       | 160 (48.8%) | 40 (46.0%)  | 34 (39.5%)  | 86 (55.5%)   |                      |
| 50-64                                       | 67 (20.4%)  | 17 (19.5%)  | 23 (26.7%)  | 27 (17.4%)   |                      |
| ≥65                                         | 28 (8.5%)   | 12 (13.8%)  | 6 (7.0%)    | 10 (6.5%)    |                      |
| Gender                                      |             |             |             |              | 0.165                |
| Female                                      | 242 (73.8%) | 58 (66.7%)  | 68 (79.1%)  | 116 (74.8%)  |                      |
| Male                                        | 86 (26.2%)  | 29 (33.3%)  | 18 (20.9%)  | 39 (25.2%)   |                      |
| Race / Ethnicity                            |             |             |             |              | 0.104                |
| White or Caucasian (not Hispanic or Latino) | 234 (71.3%) | 63 (72.4%)  | 65 (75.6%)  | 106 (68.4%)  |                      |
| Black or African American                   | 13 (4.0%)   | 2 (2.3%)    | 2 (2.3%)    | 9 (5.8%)     |                      |
| Hispanic                                    | 44 (13.4%)  | 9 (10.3%)   | 16 (18.6%)  | 19 (12.3%)   |                      |
| Asian                                       | 16 (4.9%)   | 7 (8.1%)    | 2 (2.3%)    | 7 (4.5%)     |                      |
| Patient Refused                             | 9 (2.7%)    | 4 (4.6%)    | 0 (0.0%)    | 5 (3.2%)     |                      |
| Other                                       | 12 (3.7%)   | 2 (2.3%)    | 1 (1.2%)    | 9 (5.8%)     |                      |
| CMS Geographic Region (n, %)                |             |             |             |              | 0.009                |
| Region 1: ME, NH, VT, MA, CT, RI            | 15 (4.6%)   | 4 (4.6%)    | 4 (4.7%)    | 7 (4.5%)     |                      |
| Region 2: NY, NJ, PR, VI                    | 9 (2.7%)    | 4 (4.6%)    | 2 (2.3%)    | 3 (1.9%)     |                      |
| Region 3: PA, DE, MD, DC, WV, VA            | 31 (9.5%)   | 11 (12.6%)  | 8 (9.3%)    | 12 (7.7%)    |                      |
| Region 4: KY, TN, NC, SC, GA, MS, AL, FL    | 116 (35.4%) | 29 (33.3%)  | 26 (30.2%)  | 61 (39.4%)   |                      |
| Region 5: MN, WI, IL, MI, IN, OH            | 47 (14.3%)  | 10 (11.5%)  | 17 (19.8%)  | 20 (12.9%)   |                      |
| Region 6: NM, OK, AR, TX, LA                | 59 (18.0%)  | 19 (21.8%)  | 21 (24.4%)  | 19 (12.3%)   |                      |
| Region 7: NE, IA, KS, MO                    | 16 (4.9%)   | 3 (3.5%)    | 6 (7.0%)    | 7 (4.5%)     |                      |
| Region 8: MT, ND, SD, WY, UT, CO            | 1 (0.3%)    | 1 (1.2%)    | 0 (0.0%)    | 0 (0.0%)     |                      |
| Region 9: CA, NV, AZ, GU                    | 33 (10.1%)  | 5 (5.8%)    | 2 (2.3%)    | 26 (16.8%)   |                      |
| Region 10: AK, WA, OR, ID                   | 1 (0.3%)    | 1 (1.2%)    | 0 (0.0%)    | 0 (0.0%)     |                      |
| US Geographic Region                        |             |             |             |              | 0.012                |
| Northeast                                   | 41 (12.5%)  | 11 (12.6%)  | 11 (12.8%)  | 19 (12.3%)   |                      |
| South                                       | 188 (57.3%) | 56 (64.4%)  | 50 (58.1%)  | 82 (52.9%)   |                      |
| Midwest                                     | 63 (19.2%)  | 13 (14.9%)  | 23 (26.7%)  | 27 (17.4%)   |                      |
| West                                        | 36 (11.0%)  | 7 (8.1%)    | 2 (2.3%)    | 27 (17.4%)   |                      |
| Previously Tested Positive                  | 121 (36.9%) | 32 (36.8%)  | 28 (32.6%)  | 61 (39.4%)   | 0.578                |



|                                                                     | All         | Boosted     | Primed      | Unvaccinated | P value <sup>a</sup> |
|---------------------------------------------------------------------|-------------|-------------|-------------|--------------|----------------------|
| Work in healthcare                                                  | 37 (11.3%)  | 9 (10.3%)   | 13 (15.1%)  | 15 (9.7%)    | 0.419                |
| Work in high-risk setting                                           | 33 (10.1%)  | 8 (9.2%)    | 14 (16.3%)  | 11 (7.1%)    | 0.072                |
| Live in high-risk setting                                           | 16 (4.9%)   | 3 (3.5%)    | 6 (7.0%)    | 7 (4.5%)     | 0.537                |
| Social vulnerability index, Mean (SD) <sup>b</sup>                  | 0.43 (0.22) | 0.36 (0.20) | 0.44 (0.22) | 0.47 (0.21)  | <0.001               |
| Self-Reported Comorbidity                                           |             |             |             |              |                      |
| Number of comorbidities, Mean (SD)                                  | 0.35 (0.65) | 0.39 (0.62) | 0.41 (0.77) | 0.30 (0.59)  | 0.363                |
| Asthma or Chronic Lung Disease                                      | 30 (9.2%)   | 11 (12.6%)  | 7 (8.1%)    | 12 (7.7%)    | 0.416                |
| Cirrhosis of the liver                                              | 1 (0.3%)    | 0 (0.0%)    | 1 (1.2%)    | 0 (0.0%)     | 0.264                |
| Immunocompromised Conditions or Weakened Immune System <sup>c</sup> | 16 (4.9%)   | 0 (0.0%)    | 10 (11.6%)  | 6 (3.9%)     | 0.001                |
| Diabetes                                                            | 11 (3.4%)   | 4 (4.6%)    | 3 (3.5%)    | 4 (2.6%)     | 0.674                |
| Heart Conditions or Hypertension                                    | 41 (12.5%)  | 14 (16.1%)  | 9 (10.5%)   | 18 (11.6%)   | 0.481                |
| Overweight or obesity                                               | 16 (4.9%)   | 5 (5.8%)    | 5 (5.8%)    | 6 (3.9%)     | 0.725                |
| At least 1 comorbidity                                              | 87 (26.5%)  | 28 (32.2%)  | 24 (27.9%)  | 35 (22.6%)   | 0.253                |
| Index day <sup>d</sup> acute COVID-19 symptoms                      |             |             |             |              |                      |
| Number of acute COVID-19 symptoms, Mean (SD)                        | 5.4 (2.6)   | 4.7 (2.5)   | 5.7 (2.5)   | 5.6 (2.6)    | 0.009                |
| Systemic symptoms                                                   |             |             |             |              |                      |
| Fever                                                               | 127 (38.7%) | 22 (25.3%)  | 35 (40.7%)  | 70 (45.2%)   | 0.009                |
| Chills                                                              | 165 (50.3%) | 27 (31.0%)  | 48 (55.8%)  | 90 (58.1%)   | <0.001               |
| Muscle or Body Aches                                                | 183 (55.8%) | 36 (41.4%)  | 52 (60.5%)  | 95 (61.3%)   | 0.007                |
| Headache                                                            | 224 (68.3%) | 51 (58.6%)  | 62 (72.1%)  | 111 (71.6%)  | 0.077                |
| Fatigue                                                             | 204 (62.2%) | 48 (55.2%)  | 56 (65.1%)  | 100 (64.5%)  | 0.288                |
| Respiratory symptoms                                                |             |             |             |              |                      |
| Shortness of Breath or Difficulty Breathing                         | 42 (12.8%)  | 6 (6.9%)    | 13 (15.1%)  | 23 (14.8%)   | 0.157                |
| Cough                                                               | 243 (74.1%) | 65 (74.7%)  | 63 (73.3%)  | 115 (74.2%)  | 0.976                |
| Sore Throat                                                         | 187 (57.0%) | 53 (60.9%)  | 50 (58.1%)  | 84 (54.2%)   | 0.580                |
| New/Recent Loss of Taste or Smell                                   | 35 (10.7%)  | 7 (8.1%)    | 13 (15.1%)  | 15 (9.7%)    | 0.276                |
| Congestion or Runny Nose                                            | 247 (75.3%) | 69 (79.3%)  | 72 (83.7%)  | 106 (68.4%)  | 0.018                |
| GI symptoms                                                         |             |             |             |              |                      |
| Nausea or Vomiting                                                  | 42 (12.8%)  | 7 (8.1%)    | 11 (12.8%)  | 24 (15.5%)   | 0.251                |
| Diarrhea                                                            | 69 (21.0%)  | 14 (16.1%)  | 15 (17.4%)  | 40 (25.8%)   | 0.131                |

525 SD: Standard Deviation

526 <sup>a</sup> P value refers to the comparison among Boosted, Primary and Unvaccinated.

527 <sup>b</sup> SVI ranges from 0 to 1. A community with higher value is more socially vulnerable  
528 <sup>c</sup> Immunocompromised conditions includes compromised immune system (such as from  
529 immuno-compromising drugs, solid organ or blood stem cell transplant, HIV, or other  
530 conditions), conditions that result in a weakened immune system, including cancer treatment,  
531 and kidney failure or end stage renal disease  
532 <sup>d</sup> COVID-19 test nasal swab day  
533  
534

535 Table 2. Summary of Post-COVID-19 Symptoms at 1-, 3- and 6-month follow-up

|                                                                             | All         | Boosted    | Primed     | Unvaccinated | P value |
|-----------------------------------------------------------------------------|-------------|------------|------------|--------------|---------|
| <b>Month 1</b>                                                              |             |            |            |              |         |
| n                                                                           | 328         | 87         | 86         | 155          | .       |
| Mean (SD)                                                                   | 3.1 (3.6)   | 2.0 (2.3)  | 3.1 (3.5)  | 3.7 (4.1)    | 0.002   |
| ≥3 symptoms                                                                 | 130 (39.6%) | 26 (29.9%) | 36 (41.9%) | 68 (43.9%)   | 0.091   |
| <b>General symptoms</b>                                                     |             |            |            |              |         |
| ≥1 symptom                                                                  | 154 (47.0%) | 35 (40.2%) | 44 (51.2%) | 75 (48.4%)   | 0.314   |
| Tiredness or fatigue                                                        | 135 (41.2%) | 28 (32.2%) | 42 (48.8%) | 65 (41.9%)   | 0.081   |
| Symptoms that get worse after physical or mental activities                 | 50 (15.2%)  | 8 (9.2%)   | 10 (11.6%) | 32 (20.6%)   | 0.033   |
| Fever                                                                       | 1 (0.3%)    | 0 (0.0%)   | 0 (0.0%)   | 1 (0.7%)     | 1.000   |
| General pain/discomfort                                                     | 50 (15.2%)  | 5 (5.8%)   | 15 (17.4%) | 30 (19.4%)   | 0.015   |
| <b>Respiratory and cardiac</b>                                              |             |            |            |              |         |
| ≥1 symptom                                                                  | 142 (43.3%) | 34 (39.1%) | 34 (39.5%) | 74 (47.7%)   | 0.305   |
| Difficulty breathing or shortness of breath                                 | 58 (17.7%)  | 13 (14.9%) | 13 (15.1%) | 32 (20.6%)   | 0.412   |
| Cough                                                                       | 86 (26.2%)  | 21 (24.1%) | 19 (22.1%) | 46 (29.7%)   | 0.385   |
| Chest or stomach pain                                                       | 32 (9.8%)   | 4 (4.6%)   | 10 (11.6%) | 18 (11.6%)   | 0.162   |
| Fast-beating or pounding heart (also known as heart palpitations)           | 38 (11.6%)  | 6 (6.9%)   | 11 (12.8%) | 21 (13.5%)   | 0.276   |
| <b>Neurologic</b>                                                           |             |            |            |              |         |
| ≥1 symptom                                                                  | 161 (49.1%) | 38 (43.7%) | 45 (52.3%) | 78 (50.3%)   | 0.479   |
| Change in smell or taste                                                    | 51 (15.5%)  | 5 (5.8%)   | 14 (16.3%) | 32 (20.6%)   | 0.009   |
| Headache                                                                    | 67 (20.4%)  | 10 (11.5%) | 18 (20.9%) | 39 (25.2%)   | 0.040   |
| Dizziness on standing (lightheadedness)                                     | 45 (13.7%)  | 7 (8.1%)   | 13 (15.1%) | 25 (16.1%)   | 0.195   |
| Difficulty thinking or concentrating (sometimes referred to as “brain fog”) | 86 (26.2%)  | 17 (19.5%) | 26 (30.2%) | 43 (27.7%)   | 0.234   |
| Pins-and-needles feeling                                                    | 24 (7.3%)   | 3 (3.5%)   | 7 (8.1%)   | 14 (9.0%)    | 0.263   |
| Sleep problems                                                              | 81 (24.7%)  | 14 (16.1%) | 21 (24.4%) | 46 (29.7%)   | 0.063   |
| Mood changes                                                                | 36 (11.0%)  | 6 (6.9%)   | 7 (8.1%)   | 23 (14.8%)   | 0.102   |
| Memory loss                                                                 | 38 (11.6%)  | 4 (4.6%)   | 7 (8.1%)   | 27 (17.4%)   | 0.006   |
| <b>Other</b>                                                                |             |            |            |              |         |
| ≥1 symptom                                                                  | 106 (32.3%) | 19 (21.8%) | 28 (32.6%) | 59 (38.1%)   | 0.035   |
| Diarrhea                                                                    | 23 (7.0%)   | 3 (3.5%)   | 3 (3.5%)   | 17 (11.0%)   | 0.036   |
| Joint or muscle pain                                                        | 66 (20.1%)  | 10 (11.5%) | 18 (20.9%) | 38 (24.5%)   | 0.052   |
| Rash                                                                        | 11 (3.4%)   | 2 (2.3%)   | 1 (1.2%)   | 8 (5.2%)     | 0.229   |
| Changes in period cycles                                                    | 28 (11.6%)  | 4 (6.9%)   | 8 (11.8%)  | 16 (13.8%)   | 0.447   |
| <b>Month 3</b>                                                              |             |            |            |              |         |
| n                                                                           | 292         | 73         | 77         | 142          |         |

|                                                                             | All         | Boosted    | Primed     | Unvaccinated | P value |
|-----------------------------------------------------------------------------|-------------|------------|------------|--------------|---------|
| Mean (SD)                                                                   | 2.7 (3.5)   | 1.4 (1.9)  | 2.8 (3.5)  | 3.3 (4.0)    | 0.001   |
| ≥3 symptoms                                                                 | 109 (37.3%) | 17 (23.3%) | 32 (41.6%) | 60 (42.3%)   | 0.016   |
| <b>General symptoms</b>                                                     |             |            |            |              |         |
| ≥1 symptom                                                                  | 121 (41.4%) | 24 (32.9%) | 32 (41.6%) | 65 (45.8%)   | 0.192   |
| Tiredness or fatigue                                                        | 108 (37.0%) | 21 (28.8%) | 31 (40.3%) | 56 (39.4%)   | 0.242   |
| Symptoms that get worse after physical or mental activities                 | 36 (12.3%)  | 5 (6.9%)   | 11 (14.3%) | 20 (14.1%)   | 0.259   |
| Fever                                                                       | 1 (0.3%)    | 0 (0.0%)   | 0 (0.0%)   | 1 (0.7%)     | 1.000   |
| General pain/discomfort                                                     | 43 (14.7%)  | 3 (4.1%)   | 12 (15.6%) | 28 (19.7%)   | 0.005   |
| <b>Respiratory and cardiac</b>                                              |             |            |            |              |         |
| ≥1 symptom                                                                  | 83 (28.4%)  | 15 (20.5%) | 23 (29.9%) | 45 (31.7%)   | 0.218   |
| Difficulty breathing or shortness of breath                                 | 42 (14.4%)  | 5 (6.9%)   | 15 (19.5%) | 22 (15.5%)   | 0.077   |
| Cough                                                                       | 38 (13.0%)  | 8 (11.0%)  | 9 (11.7%)  | 21 (14.8%)   | 0.675   |
| Chest or stomach pain                                                       | 17 (5.8%)   | 2 (2.7%)   | 5 (6.5%)   | 10 (7.0%)    | 0.470   |
| Fast-beating or pounding heart (also known as heart palpitations)           | 29 (9.9%)   | 3 (4.1%)   | 9 (11.7%)  | 17 (12.0%)   | 0.149   |
| <b>Neurologic</b>                                                           |             |            |            |              |         |
| ≥1 symptom                                                                  | 140 (47.9%) | 26 (35.6%) | 39 (50.6%) | 75 (52.8%)   | 0.049   |
| Change in smell or taste                                                    | 35 (12.0%)  | 5 (6.9%)   | 9 (11.7%)  | 21 (14.8%)   | 0.236   |
| Headache                                                                    | 51 (17.5%)  | 6 (8.2%)   | 14 (18.2%) | 31 (21.8%)   | 0.044   |
| Dizziness on standing (lightheadedness)                                     | 43 (14.7%)  | 3 (4.1%)   | 14 (18.2%) | 26 (18.3%)   | 0.006   |
| Difficulty thinking or concentrating (sometimes referred to as “brain fog”) | 70 (24.0%)  | 11 (15.1%) | 15 (19.5%) | 44 (31.0%)   | 0.020   |
| Pins-and-needles feeling                                                    | 28 (9.6%)   | 4 (5.5%)   | 9 (11.7%)  | 15 (10.6%)   | 0.377   |
| Sleep problems                                                              | 63 (21.6%)  | 8 (11.0%)  | 17 (22.1%) | 38 (26.8%)   | 0.028   |
| Mood changes                                                                | 31 (10.6%)  | 2 (2.7%)   | 6 (7.8%)   | 23 (16.2%)   | 0.005   |
| Memory loss                                                                 | 35 (12.0%)  | 0 (0.0%)   | 9 (11.7%)  | 26 (18.3%)   | <0.001  |
| <b>Other</b>                                                                |             |            |            |              |         |
| ≥1 symptom                                                                  | 88 (30.1%)  | 16 (21.9%) | 25 (32.5%) | 47 (33.1%)   | 0.209   |
| Diarrhea                                                                    | 18 (6.2%)   | 2 (2.7%)   | 5 (6.5%)   | 11 (7.8%)    | 0.419   |
| Joint or muscle pain                                                        | 53 (18.2%)  | 7 (9.6%)   | 15 (19.5%) | 31 (21.8%)   | 0.083   |
| Rash                                                                        | 9 (3.1%)    | 4 (5.5%)   | 0 (0.0%)   | 5 (3.5%)     | 0.091   |
| Changes in period cycles                                                    | 36 (16.7%)  | 5 (10.4%)  | 13 (22.0%) | 18 (16.7%)   | 0.278   |
|                                                                             |             |            |            |              |         |
| <b>Month 6</b>                                                              |             |            |            |              |         |
| n                                                                           | 260         | 67         | 72         | 121          | .       |
| Mean (SD)                                                                   | 2.7 (3.7)   | 1.1 (1.8)  | 2.8 (3.6)  | 3.4 (4.2)    | <0.001  |
| ≥3 symptoms                                                                 | 91 (35.0%)  | 10 (14.9%) | 27 (37.5%) | 54 (44.6%)   | <0.001  |
| <b>General symptoms</b>                                                     |             |            |            |              |         |

|                                                                             | All         | Boosted    | Primed     | Unvaccinated | P value |
|-----------------------------------------------------------------------------|-------------|------------|------------|--------------|---------|
| ≥1 symptom                                                                  | 112 (43.1%) | 16 (23.9%) | 34 (47.2%) | 62 (51.2%)   | 0.001   |
| Tiredness or fatigue                                                        | 101 (38.8%) | 15 (22.4%) | 32 (44.4%) | 54 (44.6%)   | 0.006   |
| Symptoms that get worse after physical or mental activities                 | 28 (10.8%)  | 1 (1.5%)   | 8 (11.1%)  | 19 (15.7%)   | 0.005   |
| Fever                                                                       | 3 (1.2%)    | 0 (0.0%)   | 1 (1.4%)   | 2 (1.7%)     | 0.798   |
| General pain/discomfort                                                     | 36 (13.8%)  | 2 (3.0%)   | 10 (13.9%) | 24 (19.8%)   | 0.003   |
| <b>Respiratory and cardiac</b>                                              |             |            |            |              |         |
| ≥1 symptom                                                                  | 68 (26.2%)  | 4 (6.0%)   | 18 (25.0%) | 46 (38.0%)   | <0.001  |
| Difficulty breathing or shortness of breath                                 | 32 (12.3%)  | 3 (4.5%)   | 7 (9.7%)   | 22 (18.2%)   | 0.017   |
| Cough                                                                       | 32 (12.3%)  | 0 (0.0%)   | 9 (12.5%)  | 23 (19.0%)   | <0.001  |
| Chest or stomach pain                                                       | 17 (6.5%)   | 1 (1.5%)   | 4 (5.6%)   | 12 (9.9%)    | 0.073   |
| Fast-beating or pounding heart (also known as heart palpitations)           | 29 (11.2%)  | 3 (4.5%)   | 7 (9.7%)   | 19 (15.7%)   | 0.057   |
| <b>Neurologic</b>                                                           |             |            |            |              |         |
| ≥1 symptom                                                                  | 121 (46.5%) | 21 (31.3%) | 34 (47.2%) | 66 (54.5%)   | 0.009   |
| Change in smell or taste                                                    | 27 (10.4%)  | 4 (6.0%)   | 8 (11.1%)  | 15 (12.4%)   | 0.398   |
| Headache                                                                    | 50 (19.2%)  | 5 (7.5%)   | 16 (22.2%) | 29 (24.0%)   | 0.017   |
| Dizziness on standing (lightheadedness)                                     | 38 (14.6%)  | 7 (10.4%)  | 7 (9.7%)   | 24 (19.8%)   | 0.084   |
| Difficulty thinking or concentrating (sometimes referred to as “brain fog”) | 58 (22.3%)  | 5 (7.5%)   | 19 (26.4%) | 34 (28.1%)   | 0.003   |
| Pins-and-needles feeling                                                    | 27 (10.4%)  | 3 (4.5%)   | 8 (11.1%)  | 16 (13.2%)   | 0.153   |
| Sleep problems                                                              | 52 (20.0%)  | 3 (4.5%)   | 16 (22.2%) | 33 (27.3%)   | <0.001  |
| Mood changes                                                                | 32 (12.3%)  | 3 (4.5%)   | 9 (12.5%)  | 20 (16.5%)   | 0.043   |
| Memory loss                                                                 | 37 (14.2%)  | 2 (3.0%)   | 12 (16.7%) | 23 (19.0%)   | 0.004   |
| <b>Other</b>                                                                |             |            |            |              |         |
| ≥1 symptom                                                                  | 76 (29.2%)  | 14 (20.9%) | 23 (31.9%) | 39 (32.2%)   | 0.220   |
| Diarrhea                                                                    | 14 (5.4%)   | 1 (1.5%)   | 3 (4.2%)   | 10 (8.3%)    | 0.147   |
| Joint or muscle pain                                                        | 38 (14.6%)  | 6 (9.0%)   | 12 (16.7%) | 20 (16.5%)   | 0.314   |
| Rash                                                                        | 5 (1.9%)    | 1 (1.5%)   | 0 (0.0%)   | 4 (3.3%)     | 0.323   |
| Changes in period cycles                                                    | 32 (16.8%)  | 8 (18.6%)  | 11 (20.0%) | 13 (14.0%)   | 0.596   |

536

537 Table 3. Long COVID Symptoms at Month 6 by Vaccination Status: Observed and Model-based Estimates

|                                                  | Descriptive statistics   | Observed            |         | Logistic Regression |         |
|--------------------------------------------------|--------------------------|---------------------|---------|---------------------|---------|
|                                                  |                          | Odds Ratio (95% CI) | P value | Odds Ratio (95% CI) | P value |
| <b>Base Case: <math>\geq 3</math> symptoms</b>   |                          |                     |         |                     |         |
| Boosted vs Unvaccinated                          | 10 (14.9%) vs 54 (44.6%) | 0.22 (0.10, 0.47)   | <0.001  | 0.36 (0.15, 0.87)   | 0.019   |
| Primed vs. Unvaccinated                          | 27 (37.5%) vs 54 (44.6%) | 0.74 (0.41, 1.35)   | 0.332   | 0.60 (0.27, 1.34)   | 0.296   |
| Boosted vs Primed                                | 10 (14.9%) vs 27 (37.5%) | 0.29 (0.13, 0.67)   | 0.003   | 0.59 (0.21, 1.65)   | 0.459   |
|                                                  |                          |                     |         |                     |         |
| <b>Sensitivity: <math>\geq 2</math> symptoms</b> |                          |                     |         |                     |         |
| Boosted vs Unvaccinated                          | 14 (20.9%) vs 66 (54.5%) | 0.22 (0.11, 0.44)   | <0.001  | 0.30 (0.13, 0.70)   | 0.003   |
| Primed vs. Unvaccinated                          | 35 (48.6%) vs 66 (54.5%) | 0.79 (0.44, 1.41)   | 0.425   | 0.64 (0.30, 1.39)   | 0.370   |
| Boosted vs Primed                                | 14 (20.9%) vs 35 (48.6%) | 0.28 (0.13, 0.59)   | 0.001   | 0.46 (0.18, 1.20)   | 0.140   |

538 Note for logistic regression model: the logistic regression model for number of post-COVID  $\geq 3$  versus  $< 3$  used GEE estimation with  
539 unstructured correlation matrix. Covariates were variables for time, vaccination status and interaction of time by vaccination status, as  
540 well as covariates of participant pre-COVID-19 symptom onset score, sociodemographic characteristics (age, sex, regions, social  
541 vulnerability, race/ethnicity, high risk occupations), previously tested positive for COVID-19, severity of acute illness (number of  
542 symptoms reported on index date), and immunocompromised status.

543

544 Table 4. Summary of Observed EQ-5D-5L and WPAI scores by assessment time and vaccination status in long COVID subjects

|                    |              | Score |               | Change from pre-COVID-19 |         |       | Relative to Unvaccinated |         |       | Relative to Primed |         |       |
|--------------------|--------------|-------|---------------|--------------------------|---------|-------|--------------------------|---------|-------|--------------------|---------|-------|
|                    |              | N     | Mean (SD)     | Mean (SD)                | P value | ES    | Mean (SD)                | P value | ES    | Mean (SD)          | P value | ES    |
| <b>EQ-VAS</b>      |              |       |               |                          |         |       |                          |         |       |                    |         |       |
| Pre-COVID-19       | All          | 130   | 84.9 (12.2)   |                          |         |       |                          |         |       |                    |         |       |
|                    | Boosted      | 26    | 84.6 (13.5)   |                          |         |       | -1.1 (12.1)              | 0.692   | -0.09 | 0.8 (12.9)         | 0.804   | 0.06  |
|                    | Primed       | 36    | 83.8 (12.5)   |                          |         |       | -1.9 (11.9)              | 0.431   | -0.16 |                    |         |       |
|                    | Unvaccinated | 68    | 85.7 (11.6)   |                          |         |       |                          |         |       |                    |         |       |
| Week 4             | All          | 123   | 74.2 (16.2)   | -10.9 (15.6)             | <0.001  | -0.67 |                          |         |       |                    |         |       |
|                    | Boosted      | 26    | 74.4 (18.1)   | -10.2 (16.4)             | 0.004   | -0.62 | 1.2 (16.8)               | 0.751   | 0.07  | -1.6 (16.4)        | 0.713   | -0.10 |
|                    | Primed       | 33    | 76.0 (15.0)   | -7.7 (11.8)              | 0.001   | -0.65 | 2.8 (15.8)               | 0.406   | 0.18  |                    |         |       |
|                    | Unvaccinated | 64    | 73.1 (16.2)   | -12.9 (16.8)             | <0.001  | -0.77 |                          |         |       |                    |         |       |
| Month 3            | All          | 108   | 76.4 (16.0)   | -9.0 (15.2)              | <0.001  | -0.56 |                          |         |       |                    |         |       |
|                    | Boosted      | 17    | 80.9 (10.4)   | -3.8 (13.6)              | 0.266   | -0.28 | 5.4 (16.1)               | 0.223   | 0.34  | 5.2 (14.4)         | 0.233   | 0.36  |
|                    | Primed       | 32    | 75.7 (16.1)   | -9.7 (10.2)              | <0.001  | -0.95 | 0.2 (16.9)               | 0.955   | 0.01  |                    |         |       |
|                    | Unvaccinated | 59    | 75.5 (17.3)   | -10.1 (17.7)             | <0.001  | -0.57 |                          |         |       |                    |         |       |
| Month 6            | All          | 89    | 74.5 (17.2)   | -10.0 (16.6)             | <0.001  | -0.58 |                          |         |       |                    |         |       |
|                    | Boosted      | 10    | 80.4 (11.4)   | -6.3 (11.5)              | 0.121   | -0.55 | 5.5 (15.8)               | 0.319   | 0.35  | 8.8 (18.1)         | 0.200   | 0.48  |
|                    | Primed       | 27    | 71.6 (20.0)   | -11.2 (17.4)             | 0.003   | -0.64 | -3.3 (17.7)              | 0.439   | -0.18 |                    |         |       |
|                    | Unvaccinated | 52    | 74.9 (16.5)   | -10.0 (17.2)             | <0.001  | -0.58 |                          |         |       |                    |         |       |
| <b>EQ-5D-5L UI</b> |              |       |               |                          |         |       |                          |         |       |                    |         |       |
| Pre-COVID-19       | All          | 130   | 0.879 (0.144) |                          |         |       |                          |         |       |                    |         |       |
|                    | Boosted      | 26    | 0.910 (0.109) |                          |         |       | 0.038 (0.117)            | 0.163   | 0.32  | 0.039 (0.167)      | 0.369   | 0.23  |
|                    | Primed       | 36    | 0.871 (0.199) |                          |         |       | -0.001 (0.152)           | 0.975   | -0.01 |                    |         |       |
|                    | Unvaccinated | 68    | 0.872 (0.120) |                          |         |       |                          |         |       |                    |         |       |
| Week 4             | All          | 130   | 0.744 (0.196) | -0.135 (0.160)           | <0.001  | -0.69 |                          |         |       |                    |         |       |
|                    | Boosted      | 26    | 0.827 (0.122) | -0.083 (0.126)           | 0.003   | -0.66 | 0.081 (0.162)            | 0.032   | 0.50  | 0.036 (0.139)      | 0.319   | 0.26  |
|                    | Primed       | 36    | 0.752 (0.198) | -0.119 (0.148)           | <0.001  | -0.80 | 0.045 (0.165)            | 0.188   | 0.27  |                    |         |       |
|                    | Unvaccinated | 68    | 0.708 (0.209) | -0.164 (0.173)           | <0.001  | -0.95 |                          |         |       |                    |         |       |

|                               |              | Score |               | Change from pre-COVID-19 |         |       | Relative to Unvaccinated |         |       | Relative to Primed |         |       |
|-------------------------------|--------------|-------|---------------|--------------------------|---------|-------|--------------------------|---------|-------|--------------------|---------|-------|
|                               |              | N     | Mean (SD)     | Mean (SD)                | P value | ES    | Mean (SD)                | P value | ES    | Mean (SD)          | P value | ES    |
| Month 3                       | All          | 109   | 0.742 (0.236) | -0.153 (0.188)           | <0.001  | -0.65 |                          |         |       |                    |         |       |
|                               | Boosted      | 17    | 0.877 (0.114) | -0.029 (0.114)           | 0.311   | -0.25 | 0.153 (0.177)            | 0.002   | 0.86  | 0.136 (0.168)      | 0.010   | 0.81  |
|                               | Primed       | 32    | 0.725 (0.275) | -0.165 (0.190)           | <0.001  | -0.87 | 0.017 (0.191)            | 0.685   | 0.09  |                    |         |       |
|                               | Unvaccinated | 60    | 0.713 (0.230) | -0.182 (0.191)           | <0.001  | -0.95 |                          |         |       |                    |         |       |
| Month 6                       | All          | 91    | 0.727 (0.242) | -0.156 (0.213)           | <0.001  | -0.64 |                          |         |       |                    |         |       |
|                               | Boosted      | 10    | 0.922 (0.031) | 0.001 (0.092)            | 0.973   | 0.01  | 0.156 (0.179)            | 0.014   | 0.87  | 0.218 (0.228)      | 0.014   | 0.96  |
|                               | Primed       | 27    | 0.648 (0.273) | -0.217 (0.259)           | <0.001  | -0.84 | -0.062 (0.215)           | 0.225   | -0.29 |                    |         |       |
|                               | Unvaccinated | 54    | 0.731 (0.229) | -0.155 (0.190)           | <0.001  | -0.82 |                          |         |       |                    |         |       |
| <b>Work Productivity Loss</b> |              |       |               |                          |         |       |                          |         |       |                    |         |       |
| Pre-COVID-19                  | All          | 91    | 15.1 (24.7)   |                          |         |       |                          |         |       |                    |         |       |
|                               | Boosted      | 19    | 6.6 (11.0)    |                          |         |       | -10.5 (22.4)             | 0.092   | -0.47 | -11.2 (23.5)       | 0.117   | -0.48 |
|                               | Primed       | 27    | 17.9 (29.2)   |                          |         |       | 0.8 (27.0)               | 0.907   | 0.03  |                    |         |       |
|                               | Unvaccinated | 45    | 17.1 (25.6)   |                          |         |       |                          |         |       |                    |         |       |
| Week 4                        | All          | 85    | 31.7 (25.4)   | 15.1 (32.8)              | <0.001  | 0.59  |                          |         |       |                    |         |       |
|                               | Boosted      | 17    | 26.8 (24.1)   | 19.4 (26.9)              | 0.010   | 0.72  | -12.6 (25.1)             | 0.087   | -0.50 | 4.3 (23.3)         | 0.562   | 0.18  |
|                               | Primed       | 26    | 22.5 (22.8)   | 2.7 (30.1)               | 0.649   | 0.09  | -16.8 (24.5)             | 0.008   | -0.69 |                    |         |       |
|                               | Unvaccinated | 42    | 39.3 (25.5)   | 20.5 (35.4)              | 0.001   | 0.58  |                          |         |       |                    |         |       |
| Month 3                       | All          | 74    | 26.1 (26.6)   | 13.3 (35.2)              | 0.002   | 0.50  |                          |         |       |                    |         |       |
|                               | Boosted      | 11    | 18.2 (23.1)   | 11.2 (25.0)              | 0.170   | 0.45  | -12.1 (25.6)             | 0.173   | -0.47 | -4.9 (26.8)        | 0.616   | -0.18 |
|                               | Primed       | 25    | 23.1 (28.2)   | 11.7 (40.1)              | 0.157   | 0.29  | -7.2 (27.0)              | 0.305   | -0.27 |                    |         |       |
|                               | Unvaccinated | 38    | 30.3 (26.2)   | 14.8 (35.5)              | 0.014   | 0.42  |                          |         |       |                    |         |       |
| Month 6                       | All          | 60    | 33.9 (26.2)   | 19.9 (38.0)              | <0.001  | 0.76  |                          |         |       |                    |         |       |
|                               | Boosted      | 6     | 43.1 (29.8)   | 31.4 (29.1)              | 0.057   | 1.08  | 6.5 (26.6)               | 0.587   | 0.24  | 15.8 (26.2)        | 0.203   | 0.60  |
|                               | Primed       | 22    | 27.4 (25.3)   | 11.5 (41.3)              | 0.205   | 0.28  | -9.3 (25.7)              | 0.199   | -0.36 |                    |         |       |
|                               | Unvaccinated | 32    | 36.6 (26.1)   | 22.5 (37.7)              | 0.002   | 0.60  |                          |         |       |                    |         |       |
| <b>Activity Impairment</b>    |              |       |               |                          |         |       |                          |         |       |                    |         |       |
| Pre-COVID-19                  | All          | 130   | 21.3 (29.3)   |                          |         |       |                          |         |       |                    |         |       |
|                               | Boosted      | 26    | 14.2 (22.5)   |                          |         |       | -8.9 (28.3)              | 0.179   | -0.31 | -8.8 (28.2)        | 0.229   | -0.31 |



|         |              | Score |             | Change from pre-COVID-19 |         |      | Relative to Unvaccinated |         |       | Relative to Primed |         |       |
|---------|--------------|-------|-------------|--------------------------|---------|------|--------------------------|---------|-------|--------------------|---------|-------|
|         |              | N     | Mean (SD)   | Mean (SD)                | P value | ES   | Mean (SD)                | P value | ES    | Mean (SD)          | P value | ES    |
|         | Primed       | 36    | 23.1 (31.7) |                          |         |      | 0.0 (30.7)               | 0.996   | 0.00  |                    |         |       |
|         | Unvaccinated | 68    | 23.1 (30.2) |                          |         |      |                          |         |       |                    |         |       |
| Week 4  | All          | 130   | 38.1 (25.7) | 16.8 (35.6)              | <0.001  | 0.65 |                          |         |       |                    |         |       |
|         | Boosted      | 26    | 31.2 (19.7) | 16.9 (20.9)              | <0.001  | 0.81 | -15.2 (24.4)             | 0.008   | -0.62 | 3.7 (22.3)         | 0.528   | 0.16  |
|         | Primed       | 36    | 27.5 (24.1) | 4.4 (34.9)               | 0.451   | 0.13 | -18.8 (25.3)             | <0.001  | -0.74 |                    |         |       |
|         | Unvaccinated | 68    | 46.3 (26.0) | 23.2 (39.0)              | <0.001  | 0.60 |                          |         |       |                    |         |       |
| Month 3 | All          | 109   | 31.7 (28.3) | 12.9 (36.6)              | <0.001  | 0.46 |                          |         |       |                    |         |       |
|         | Boosted      | 17    | 28.2 (24.6) | 14.1 (26.5)              | 0.044   | 0.53 | -4.3 (27.8)              | 0.579   | -0.15 | -4.0 (28.5)        | 0.646   | -0.14 |
|         | Primed       | 32    | 32.2 (30.4) | 14.7 (37.6)              | 0.035   | 0.39 | -0.3 (29.2)              | 0.961   | -0.01 |                    |         |       |
|         | Unvaccinated | 60    | 32.5 (28.6) | 11.7 (38.9)              | 0.024   | 0.30 |                          |         |       |                    |         |       |
| Month 6 | All          | 91    | 37.5 (27.5) | 17.4 (39.2)              | <0.001  | 0.63 |                          |         |       |                    |         |       |
|         | Boosted      | 10    | 31.0 (24.2) | 27.0 (25.4)              | 0.010   | 1.06 | -9.6 (27.5)              | 0.316   | -0.35 | -2.7 (26.8)        | 0.787   | -0.10 |
|         | Primed       | 27    | 33.7 (27.6) | 13.3 (37.0)              | 0.073   | 0.36 | -6.9 (27.9)              | 0.299   | -0.25 |                    |         |       |
|         | Unvaccinated | 54    | 40.6 (28.0) | 17.6 (42.4)              | 0.004   | 0.41 |                          |         |       |                    |         |       |

545

546

547

548

549

550 Table 5. Least-Square Mean Estimates and 95% CI of EQ-5D-5L and WPAI-GH scores in long COVID subjects

|                                 |              | Score                | Change from pre-COVID   |         |       | Compared to Unvaccinated |         |       | Compared to Primed    |         |       |
|---------------------------------|--------------|----------------------|-------------------------|---------|-------|--------------------------|---------|-------|-----------------------|---------|-------|
|                                 |              | LSE (95% CI)         | LSE (95% CI)            | P value | ES    | LSE (95% CI)             | P value | ES    | LSE (95% CI)          | P value | ES    |
| EQ-5D-5L: Utility Index         |              |                      |                         |         |       |                          |         |       |                       |         |       |
| Pre-COVID (Observed), Mean (SD) | Boosted      | 0.910 (0.109)        |                         |         |       |                          |         |       |                       |         |       |
|                                 | Primed       | 0.871 (0.199)        |                         |         |       |                          |         |       |                       |         |       |
|                                 | Unvaccinated | 0.872 (0.120)        |                         |         |       |                          |         |       |                       |         |       |
| Week 4                          | Boosted      | 0.830 (0.748, 0.912) | -0.056 (-0.138, 0.027)  | 0.183   | -0.44 | 0.076 (-0.012, 0.164)    | 0.108   | 0.47  | 0.028 (-0.069, 0.125) | 0.772   | 0.20  |
|                                 | Primed       | 0.802 (0.722, 0.881) | -0.084 (-0.163, -0.004) | 0.039   | -0.57 | 0.048 (-0.032, 0.127)    | 0.337   | 0.29  |                       |         |       |
|                                 | Unvaccinated | 0.754 (0.689, 0.820) | -0.131 (-0.197, -0.066) | <0.001  | -0.76 |                          |         |       |                       |         |       |
| Month 3                         | Boosted      | 0.910 (0.808, 1.011) | 0.024 (-0.078, 0.125)   | 0.644   | 0.21  | 0.161 (0.046, 0.275)     | 0.003   | 0.91  | 0.137 (0.011, 0.263)  | 0.030   | 0.81  |
|                                 | Primed       | 0.773 (0.687, 0.859) | -0.113 (-0.199, -0.027) | 0.011   | -0.59 | 0.024 (-0.070, 0.118)    | 0.818   | 0.13  |                       |         |       |
|                                 | Unvaccinated | 0.749 (0.678, 0.819) | -0.137 (-0.207, -0.067) | <0.001  | -0.72 |                          |         |       |                       |         |       |
| Month 6                         | Boosted      | 0.910 (0.790, 1.030) | 0.024 (-0.096, 0.144)   | 0.688   | 0.27  | 0.152 (0.007, 0.298)     | 0.038   | 0.85  | 0.202 (0.045, 0.359)  | 0.008   | 0.89  |
|                                 | Primed       | 0.708 (0.617, 0.800) | -0.178 (-0.269, -0.086) | <0.001  | -0.69 | -0.050 (-0.153, 0.054)   | 0.497   | -0.23 |                       |         |       |
|                                 | Unvaccinated | 0.758 (0.685, 0.831) | -0.128 (-0.201, -0.055) | 0.001   | -0.67 |                          |         |       |                       |         |       |
| EQ-5D-5L: VAS                   |              |                      |                         |         |       |                          |         |       |                       |         |       |
| Pre-COVID (Observed), Mean (SD) | Boosted      | 84.6 (13.5)          |                         |         |       |                          |         |       |                       |         |       |
|                                 | Primed       | 83.8 (12.5)          |                         |         |       |                          |         |       |                       |         |       |
|                                 | Unvaccinated | 85.7 (11.6)          |                         |         |       |                          |         |       |                       |         |       |
| Week 4                          | Boosted      | 77.3 (70.2, 84.3)    | -7.8 (-14.9, -0.7)      | 0.032   | -0.43 | -0.2 (-8.0, 7.6)         | 0.998   | -0.01 | -3.4 (-12.1, 5.3)     | 0.618   | -0.21 |
|                                 | Primed       | 80.7 (73.8, 87.6)    | -4.3 (-11.3, 2.7)       | 0.218   | -0.29 | 3.2 (-4.0, 10.5)         | 0.544   | 0.20  |                       |         |       |

|                                     |              |                   |                    |       |       |                    |       |       |                     |       |       |
|-------------------------------------|--------------|-------------------|--------------------|-------|-------|--------------------|-------|-------|---------------------|-------|-------|
|                                     |              |                   | 2.6)               |       |       |                    |       |       |                     |       |       |
|                                     | Unvaccinated | 77.5 (71.8, 83.1) | -7.6 (-13.2, -2.0) | 0.008 | -0.47 |                    |       |       |                     |       |       |
| Month 3                             | Boosted      | 82.6 (74.5, 90.6) | -2.5 (-10.5, 5.6)  | 0.545 | -0.24 | 2.3 (-6.5, 11.1)   | 0.806 | 0.14  | 3.6 (-6.2, 13.3)    | 0.663 | 0.25  |
|                                     | Primed       | 79.0 (72.1, 85.9) | -6.0 (-13.0, 0.9)  | 0.087 | -0.38 | -1.2 (-8.5, 6.0)   | 0.914 | -0.07 |                     |       |       |
|                                     | Unvaccinated | 80.2 (74.5, 86.0) | -4.8 (-10.5, 0.9)  | 0.099 | -0.28 |                    |       |       |                     |       |       |
| Month 6                             | Boosted      | 82.3 (72.3, 92.2) | -2.8 (-12.7, 7.2)  | 0.584 | -0.24 | 2.7 (-9.6, 14.9)   | 0.865 | 0.17  | 4.8 (-8.3, 17.9)    | 0.658 | 0.27  |
|                                     | Primed       | 77.4 (69.8, 85.1) | -7.6 (-15.2, 0.0)  | 0.051 | -0.38 | -2.2 (-10.8, 6.4)  | 0.820 | -0.12 |                     |       |       |
|                                     | Unvaccinated | 79.6 (73.6, 85.7) | -5.4 (-11.5, 0.6)  | 0.079 | -0.33 |                    |       |       |                     |       |       |
| <b>WPAI: Work Productivity Loss</b> |              |                   |                    |       |       |                    |       |       |                     |       |       |
| Pre-COVID (Observed), Mean (SD)     | Boosted      | 6.6 (11.0)        |                    |       |       |                    |       |       |                     |       |       |
|                                     | Primed       | 17.9 (29.2)       |                    |       |       |                    |       |       |                     |       |       |
|                                     | Unvaccinated | 17.1 (25.6)       |                    |       |       |                    |       |       |                     |       |       |
| Week 4                              | Boosted      | 25.5 (9.4, 41.7)  | 11.8 (-4.3, 28.0)  | 0.149 | 0.49  | -8.2 (-25.0, 8.7)  | 0.484 | -0.32 | 4.2 (-14.1, 22.48)  | 0.849 | 0.18  |
|                                     | Primed       | 21.4 (6.6, 36.2)  | 7.7 (-7.1, 22.5)   | 0.306 | 0.34  | -12.3 (-28.0, 3.3) | 0.151 | -0.50 |                     |       |       |
|                                     | Unvaccinated | 33.7 (20.9, 46.5) | 20.0 (7.2, 32.8)   | 0.003 | 0.78  |                    |       |       |                     |       |       |
| Month 3                             | Boosted      | 10.1 (0, 30.8)    | -3.6 (-24.4, 17.1) | 0.728 | -0.16 | -18.5 (-41.0, 4.0) | 0.129 | -0.72 | -12.8 (-37.4, 11.9) | 0.437 | -0.48 |
|                                     | Primed       | 22.8 (7.0, 38.7)  | 9.1 (-6.7, 25.0)   | 0.257 | 0.32  | -5.7 (-23.4, 12.1) | 0.725 | -0.21 |                     |       |       |
|                                     | Unvaccinated | 28.5 (14.1, 43.0) | 14.8 (0.3, 29.3)   | 0.045 | 0.57  |                    |       |       |                     |       |       |
| Month 6                             | Boosted      | 42.6 (18.2, 67.0) | 28.9 (4.5, 53.3)   | 0.021 | 0.97  | 7.89 (-21.3, 37.1) | 0.796 | 0.30  | 15.9 (-15.1, 47.0)  | 0.442 | 0.61  |
|                                     | Primed       | 26.7 (9.7, 43.6)  | 12.9 (-4.0, 29.8)  | 0.132 | 0.51  | -8.1 (-28.0, 11.9) | 0.604 | -0.31 |                     |       |       |

|                                 |              |                   |                    |        |       |                     |        |       |                    |       |       |
|---------------------------------|--------------|-------------------|--------------------|--------|-------|---------------------|--------|-------|--------------------|-------|-------|
|                                 | Unvaccinated | 34.7 (20.1, 49.3) | 21.0 (6.4, 35.6)   | 0.005  | 0.81  |                     |        |       |                    |       |       |
| WPAI: Activity Impairment       |              |                   |                    |        |       |                     |        |       |                    |       |       |
| Pre-COVID (Observed), Mean (SD) | Boosted      | 14.2 (22.5)       |                    |        |       |                     |        |       |                    |       |       |
|                                 | Primed       | 23.1 (31.7)       |                    |        |       |                     |        |       |                    |       |       |
|                                 | Unvaccinated | 23.1 (30.2)       |                    |        |       |                     |        |       |                    |       |       |
| Week 4                          | Boosted      | 25.7 (14.1, 37.4) | 5.6 (-6.1, 17.3)   | 0.346  | 0.28  | -13.0 (-26.1, 0.1)  | 0.053  | -0.53 | 6.9 (-7.4, 21.3)   | 0.489 | 0.31  |
|                                 | Primed       | 18.8 (7.7, 30.0)  | -1.3 (-12.5, 9.8)  | 0.813  | -0.06 | -19.9 (-31.6, -8.2) | <0.001 | -0.79 |                    |       |       |
|                                 | Unvaccinated | 38.7 (29.5, 47.9) | 18.6 (9.3, 27.8)   | <0.001 | 0.71  |                     |        |       |                    |       |       |
| Month 3                         | Boosted      | 17.8 (2.0, 33.6)  | -2.3 (-18.1, 13.4) | 0.770  | -0.10 | -7.1 (-25.6, 11.4)  | 0.635  | -0.26 | -5.4 (-25.8, 14.9) | 0.802 | -0.19 |
|                                 | Primed       | 23.3 (10.5, 36.0) | 3.1 (-9.7, 15.9)   | 0.632  | 0.10  | -1.7 (-16.6, 13.2)  | 0.963  | -0.06 |                    |       |       |
|                                 | Unvaccinated | 24.9 (14.6, 35.3) | 4.8 (-5.6, 15.1)   | 0.365  | 0.17  |                     |        |       |                    |       |       |
| Month 6                         | Boosted      | 29.8 (11.2, 48.4) | 9.6 (-9.0, 28.3)   | 0.308  | 0.40  | -4.6 (-27.9, 18.6)  | 0.885  | -0.17 | 5.3 (-19.6, 30.2)  | 0.870 | 0.20  |
|                                 | Primed       | 24.5 (11.1, 37.9) | 4.4 (-9.0, 17.7)   | 0.521  | 0.16  | -9.9 (-25.7, 5.9)   | 0.301  | -0.36 |                    |       |       |
|                                 | Unvaccinated | 34.4 (24.0, 44.9) | 14.3 (3.8, 24.7)   | 0.008  | 0.51  |                     |        |       |                    |       |       |

551 Note: Mixed models for repeated measurements with unstructured correlation matrix include variables for time, vaccination status and  
552 interaction of time by vaccination status, as well as covariates of participant pre-COVID-19 symptom onset score, sociodemographic  
553 characteristics (age, sex, regions, social vulnerability, race/ethnicity, high risk occupations), previously tested positive for COVID-19,  
554 severity of acute illness (number of symptoms reported on index date), and immunocompromised status.

555

556 Figure 1. Trajectory of prevalence of long COVID over time, by vaccination status and type

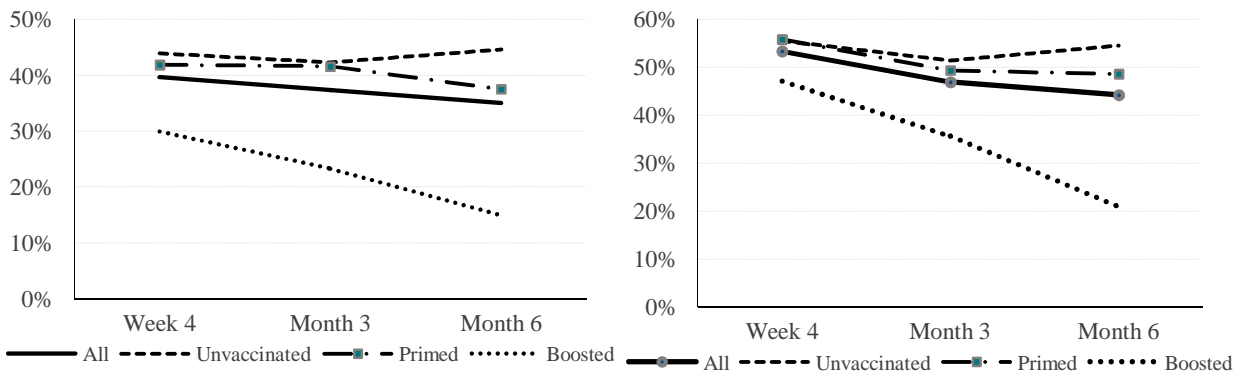

557 — All — Unvaccinated — Primed ..... Boosted — All — Unvaccinated — Primed ..... Boosted

558 (a)  $\geq 3$  symptoms

(b)  $\geq 2$  symptoms

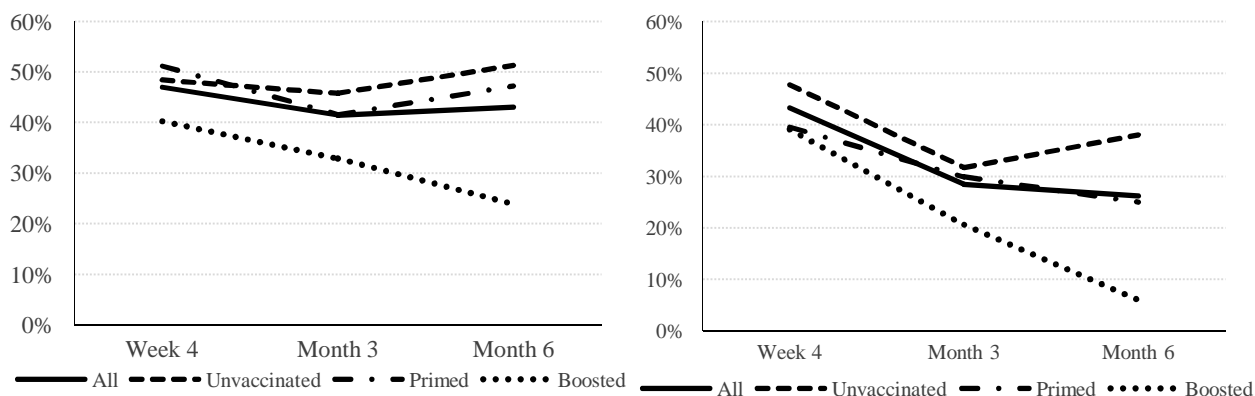

559 — All — Unvaccinated — Primed ..... Boosted — All — Unvaccinated — Primed ..... Boosted

560 (c)  $\geq 1$  General Symptoms

(d)  $\geq 1$  Respiratory and Cardiac Symptoms

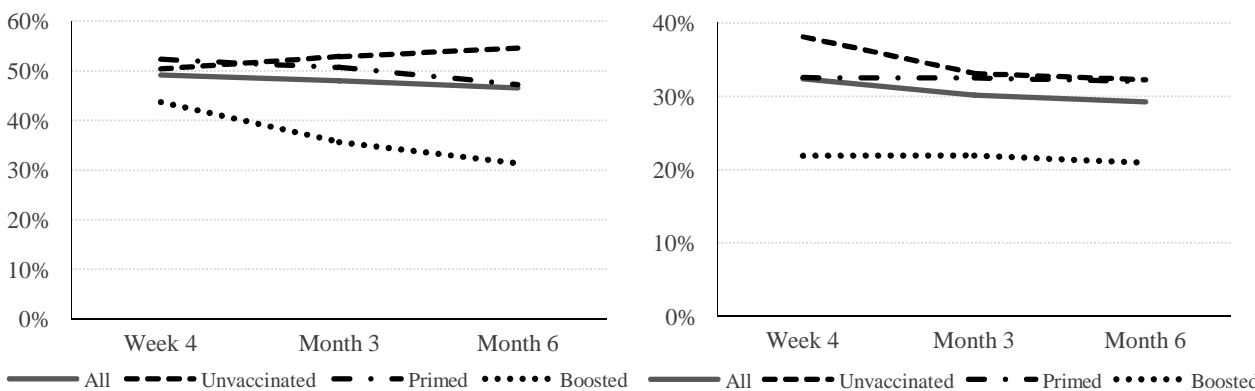

561 — All — Unvaccinated — Primed ..... Boosted — All — Unvaccinated — Primed ..... Boosted

562 (e)  $\geq 1$  Neurologic Symptoms

563 (f)  $\geq 1$  Other Symptoms  
564 (diarrhea, joint or muscle pain, rash, changes in periods)

565 Supplemental Material

566 Supplemental Figure 1 Study Flow Chart

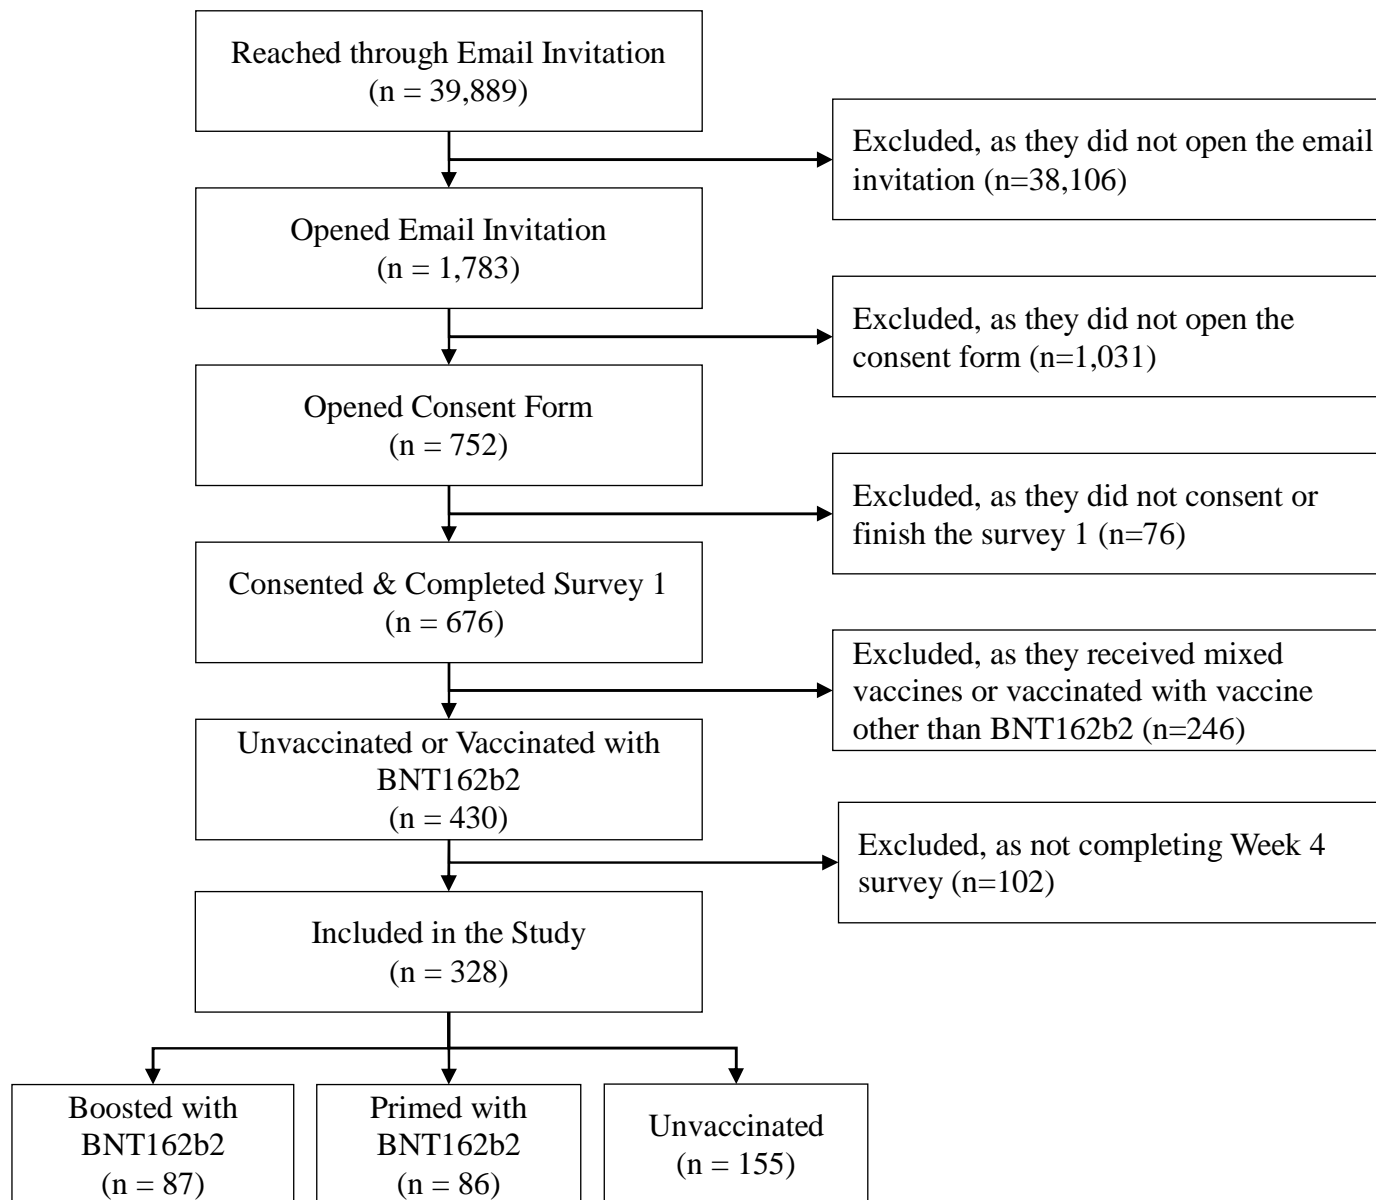

567

568

569 Supplemental Figure 2 Questionnaire on long COVID symptoms

Do you experience the following **Ongoing COVID-related symptoms or NEW symptoms TODAY that you did not have before your participation in this survey study?** (Check all that apply)

**General symptoms**

- Tiredness or fatigue
- Symptoms that get worse after physical or mental activities
- Fever
- General pain/discomfort

**Respiratory and Cardiac**

- Difficulty breathing or shortness of breath
- Cough
- Chest or stomach pain
- Fast-beating or pounding heart (also known as heart palpitations)

**Neurologic**

- Change in smell or taste
- Headache
- Dizziness on standing (lightheadedness)
- Difficulty thinking or concentrating (sometimes referred to as “brain fog”)
- Pins-and-needles feeling
- Sleep problems
- Mood changes
- Memory loss

**Other**

- Diarrhea
- Joint or muscle pain
- Rash
- Changes in period cycles (women)

570

571 Source: Centers for Disease Control and Prevention. Long COVID or Post-COVID Conditions.  
572 <https://www.cdc.gov/coronavirus/2019-ncov/long-term-effects/index.html> Accessed August 15,  
573 2022.

574

575 Supplemental Figure 3 Prevalence of long COVID symptoms by vaccination status

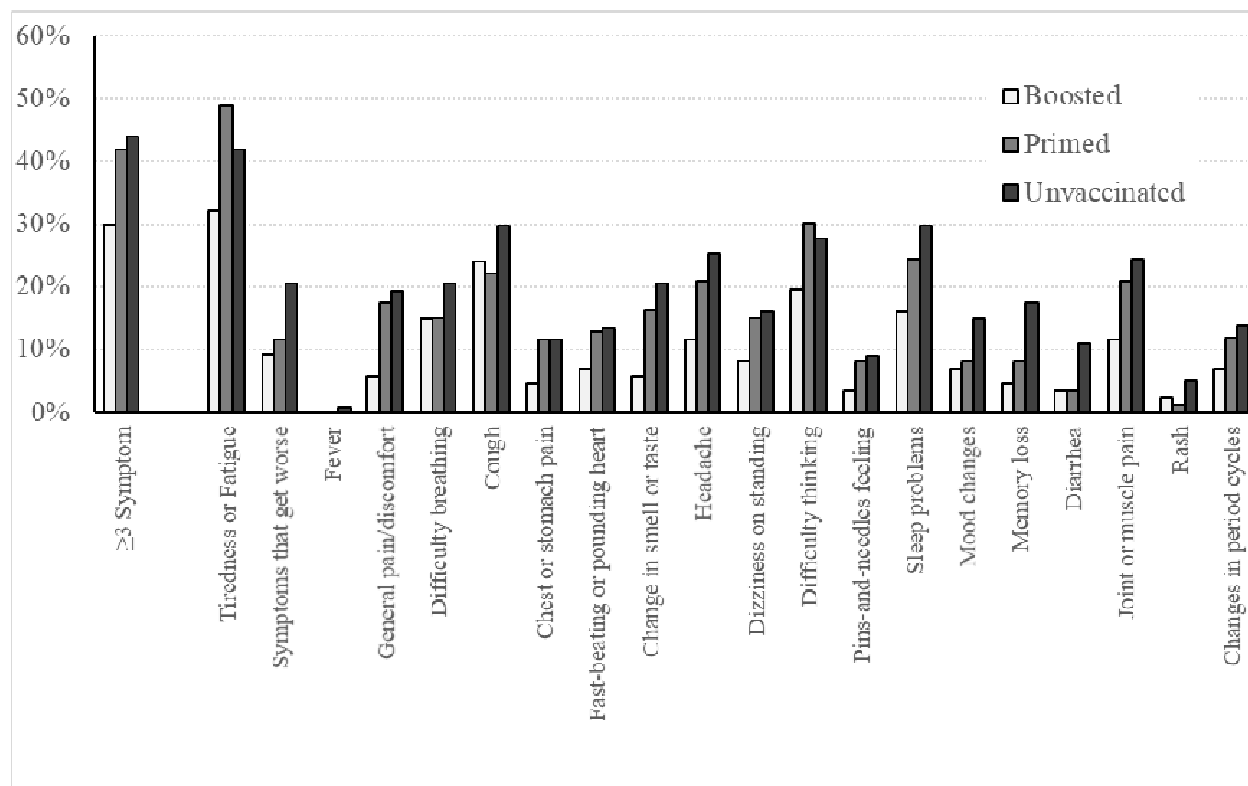

(a) Week 4

576  
577  
578

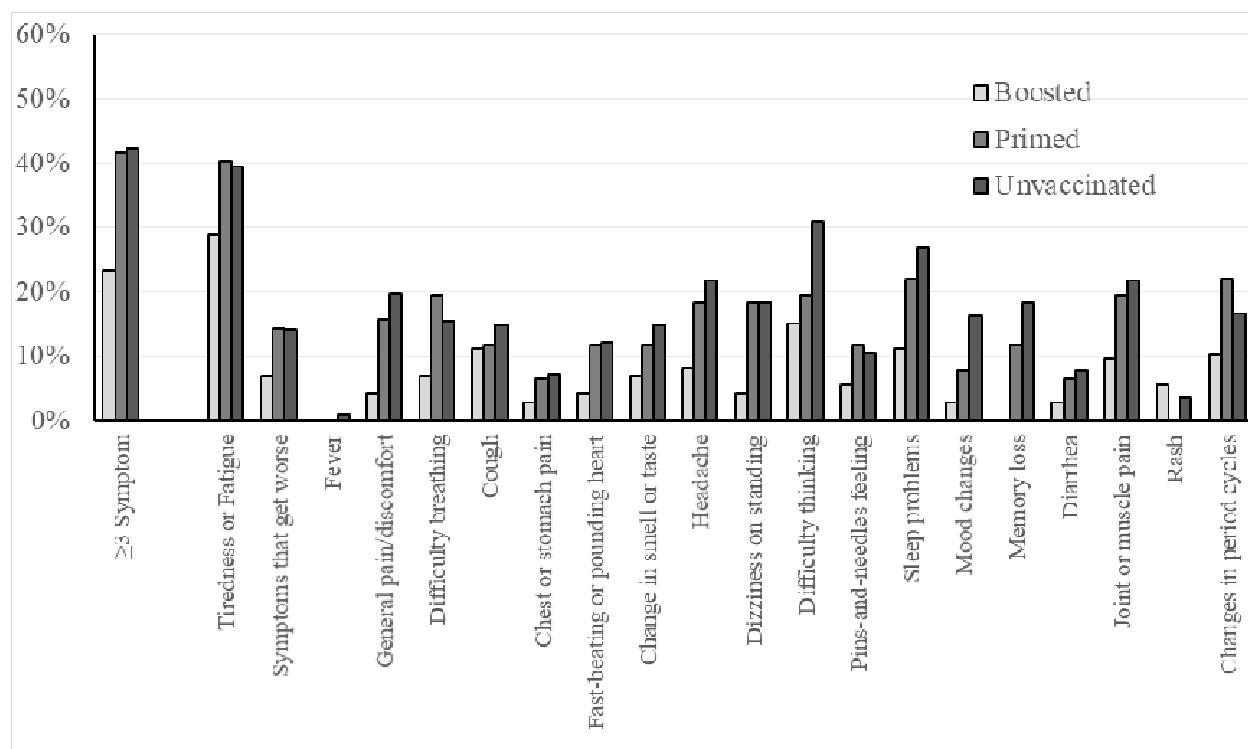

(b) Month 3

579  
580



581

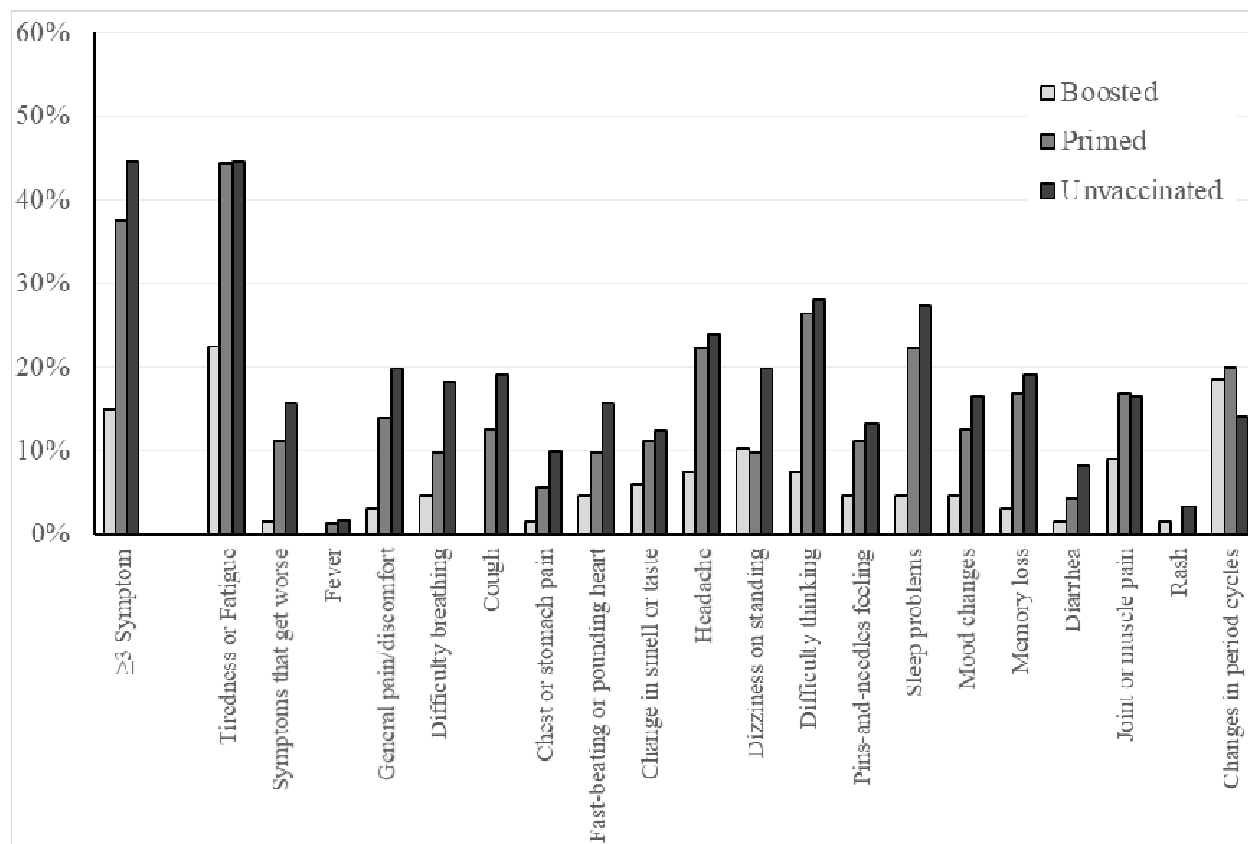

(c) Month 6

582  
583  
584  
585  
586  
587

588 Supplemental Figure 4 Number of symptoms over time by vaccination status

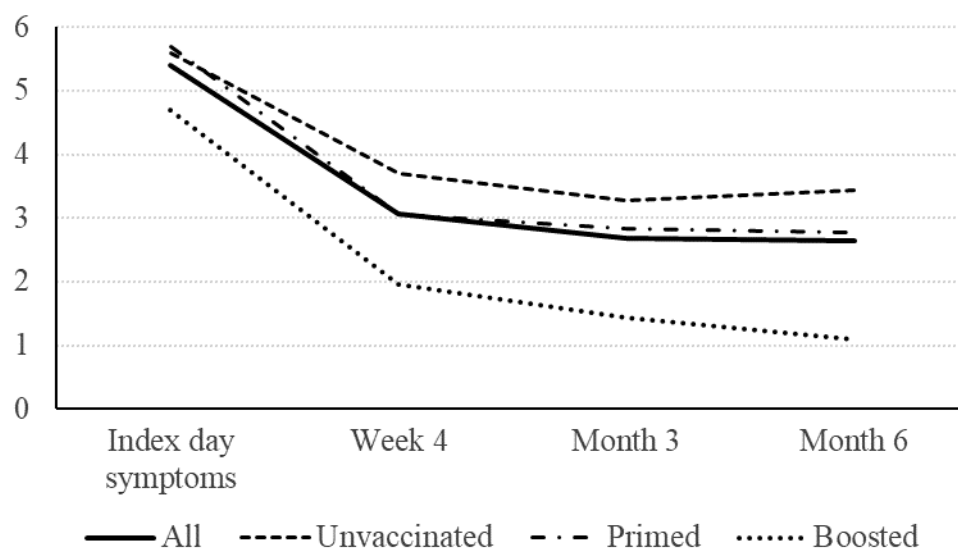

589

590 Note: data collection at Index Day was based on 12 acute respiratory infection symptoms. At

591 Week 4, Month 3 and Month 6, data collection was based on 20 long COVID symptoms.

592

593 Supplemental Figure 5 Absence of long COVID symptoms by vaccination status  
594

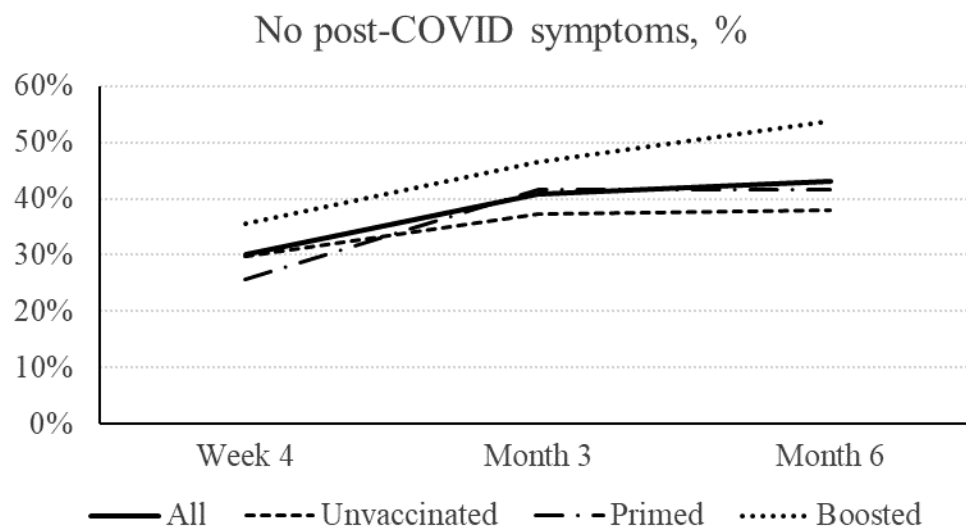

595  
596
